# Supplementary material for: Lycodine-Type Alkaloids from Lycopodiastrum casuarinoides and Their Acetylcholinesterase Inhibitory Activity
Source: MDPI journal article supplement (doi:10.3390/molecules19079999), 2014-07-10

# Supplementary Information

Figure S1.  $^1\text{H}$ -NMR spectrum of compound **1**.

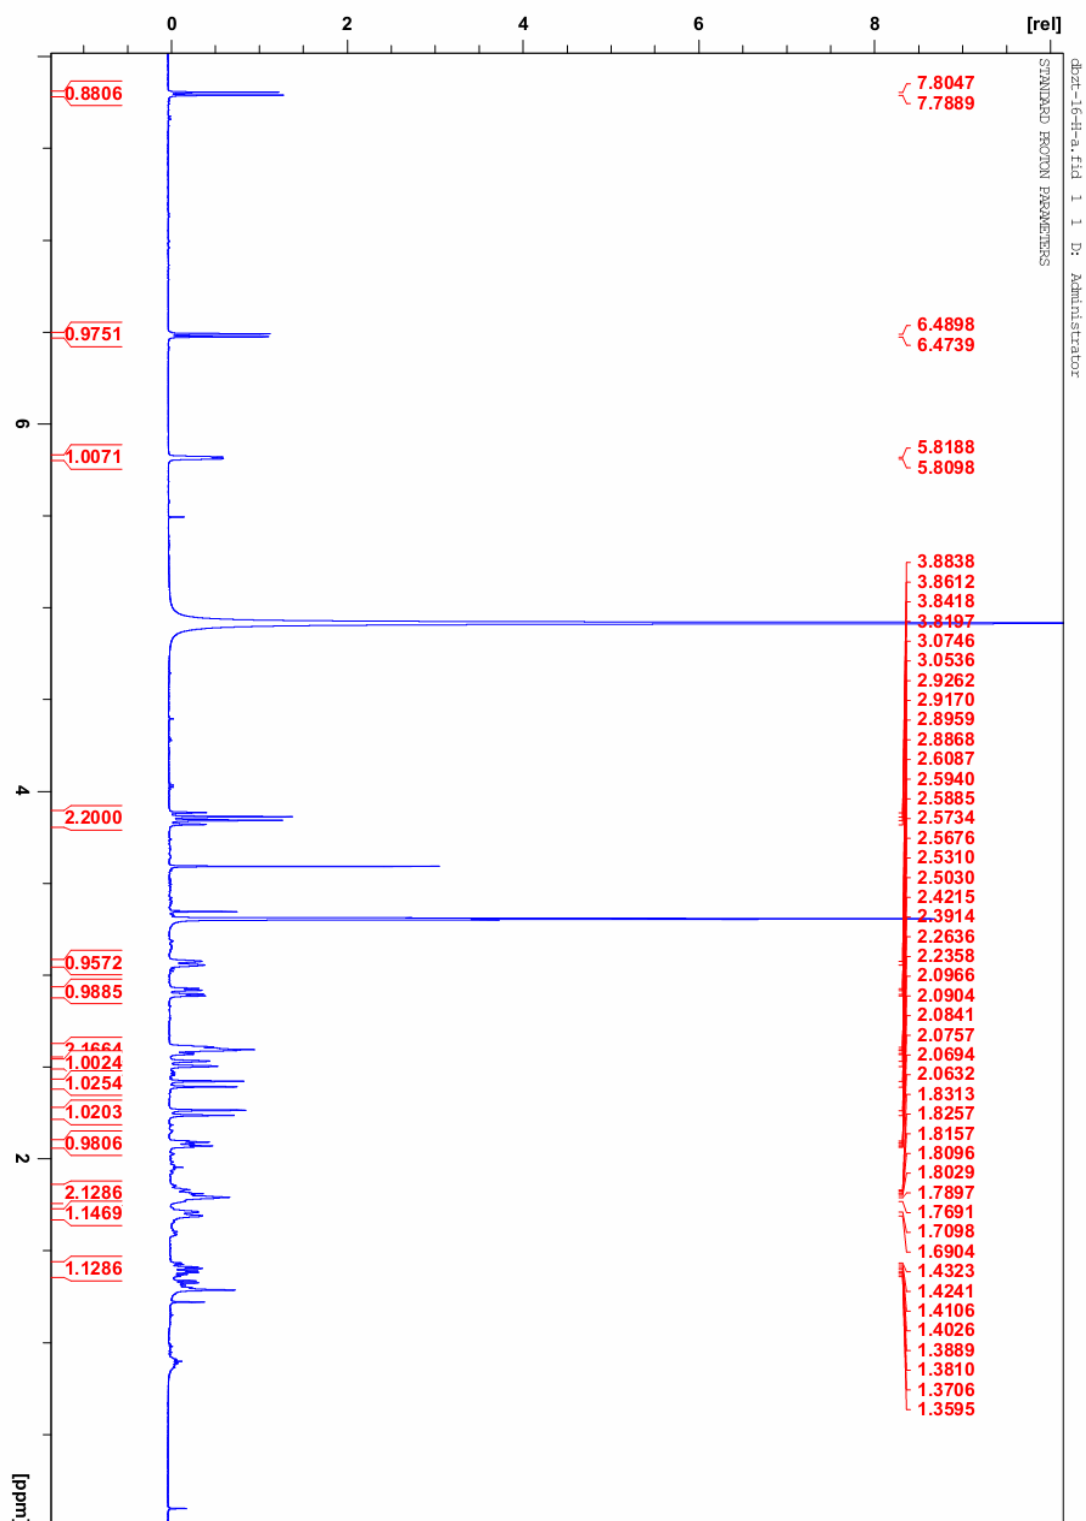

**Figure S2.**  $^{13}\text{C}$ -NMR spectrum of compound **1**.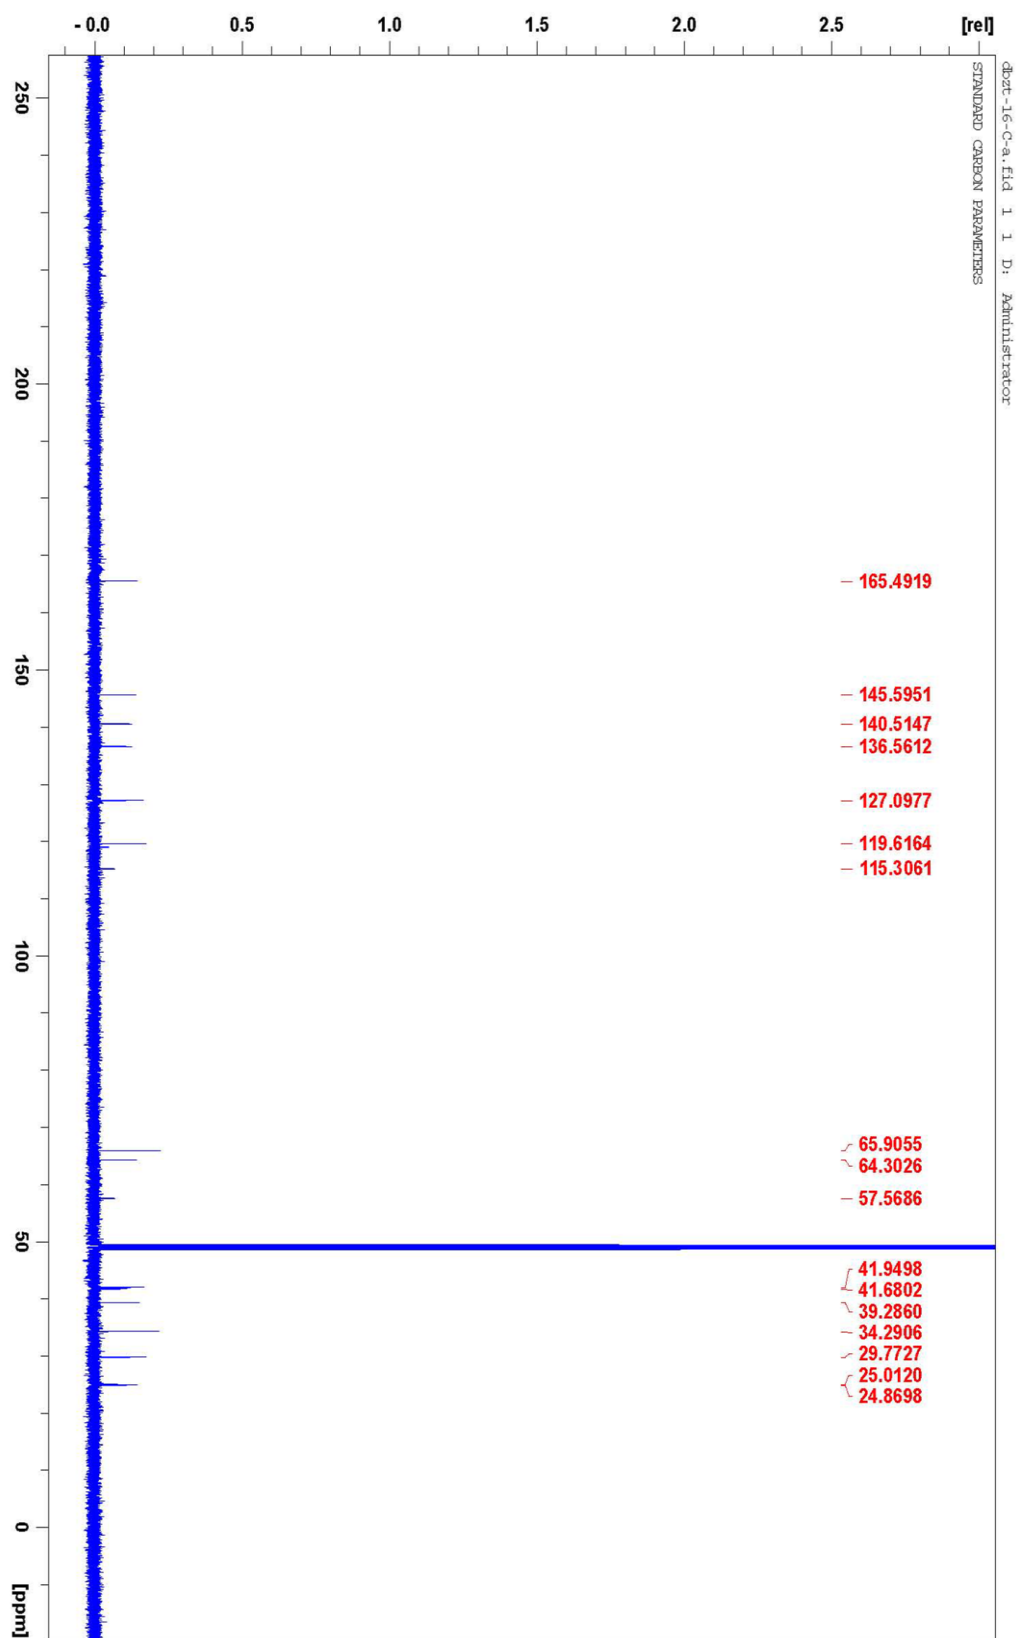

**Figure S3.**  $^1\text{H}$ - $^1\text{H}$  COSY spectrum of compound 1.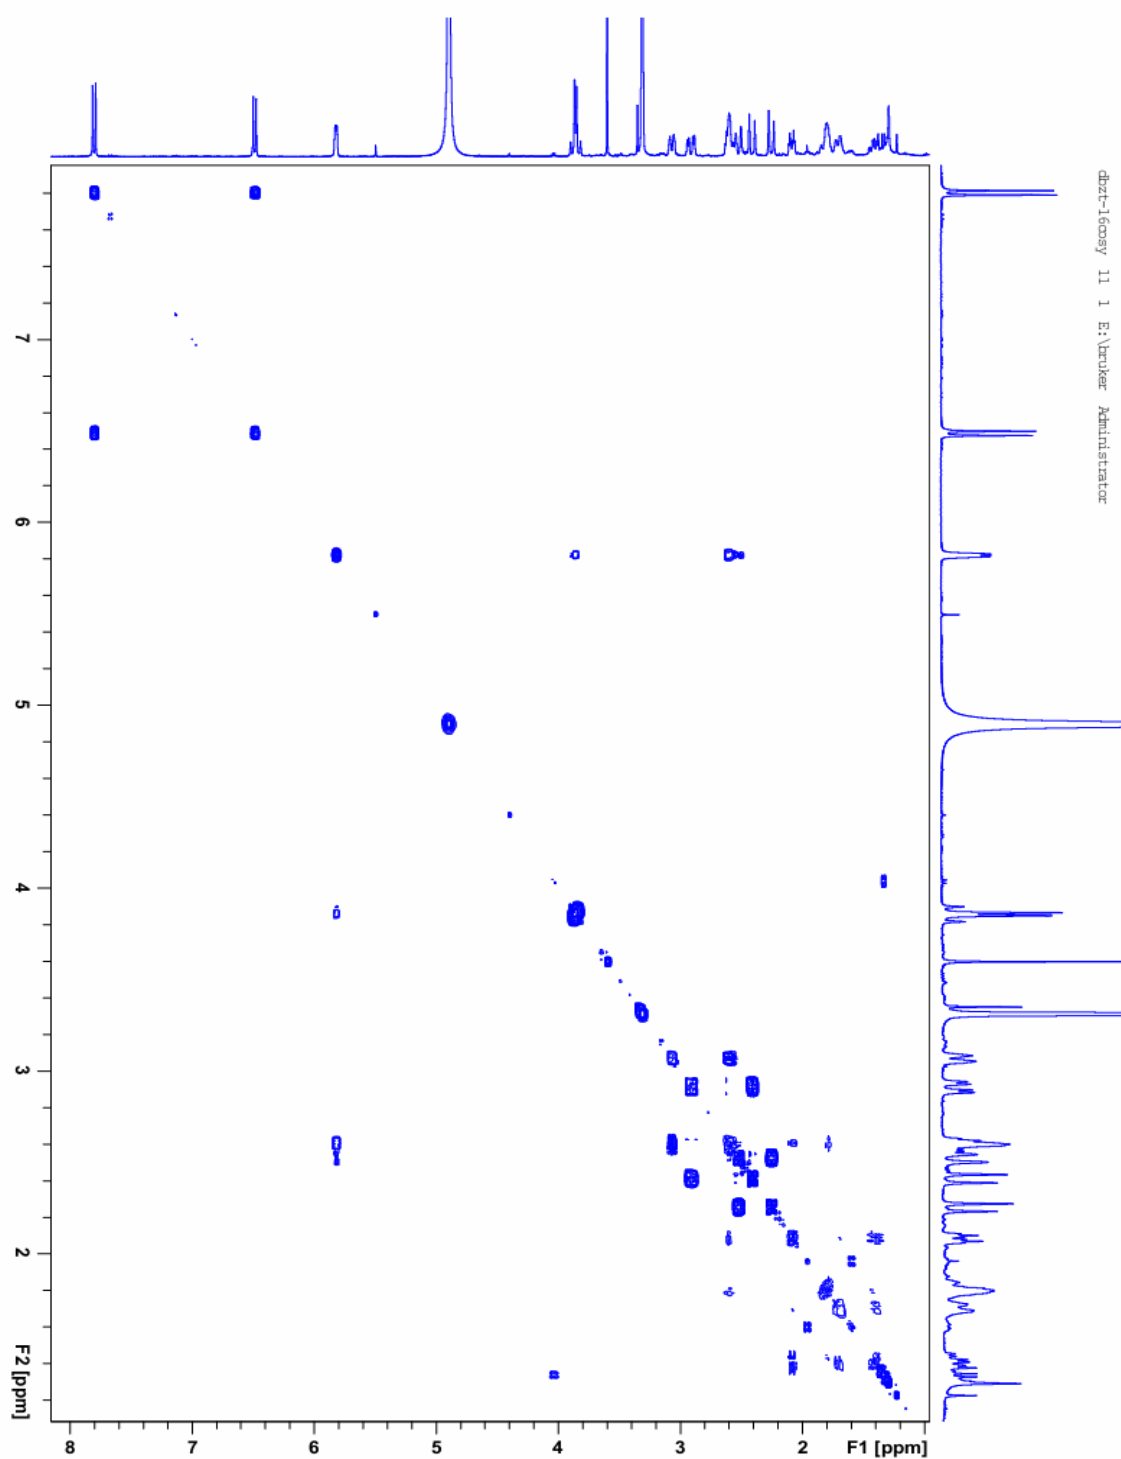

**Figure S4.** HSQC spectrum of compound **1**.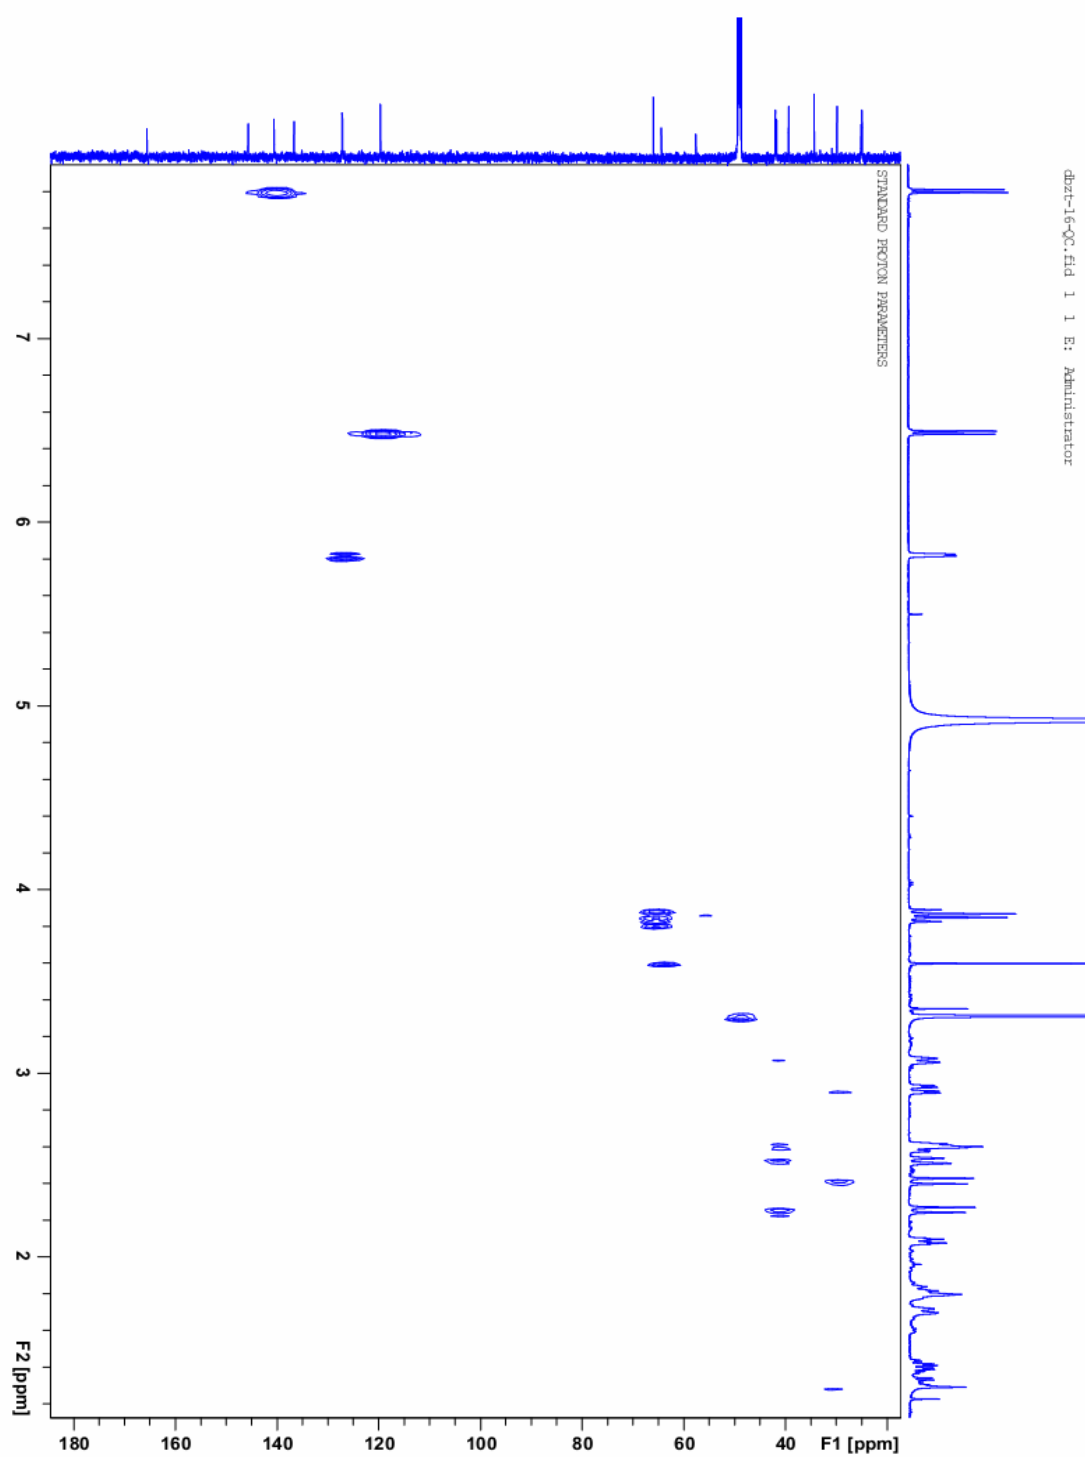

**Figure S5.** HMBC spectrum of compound **1**.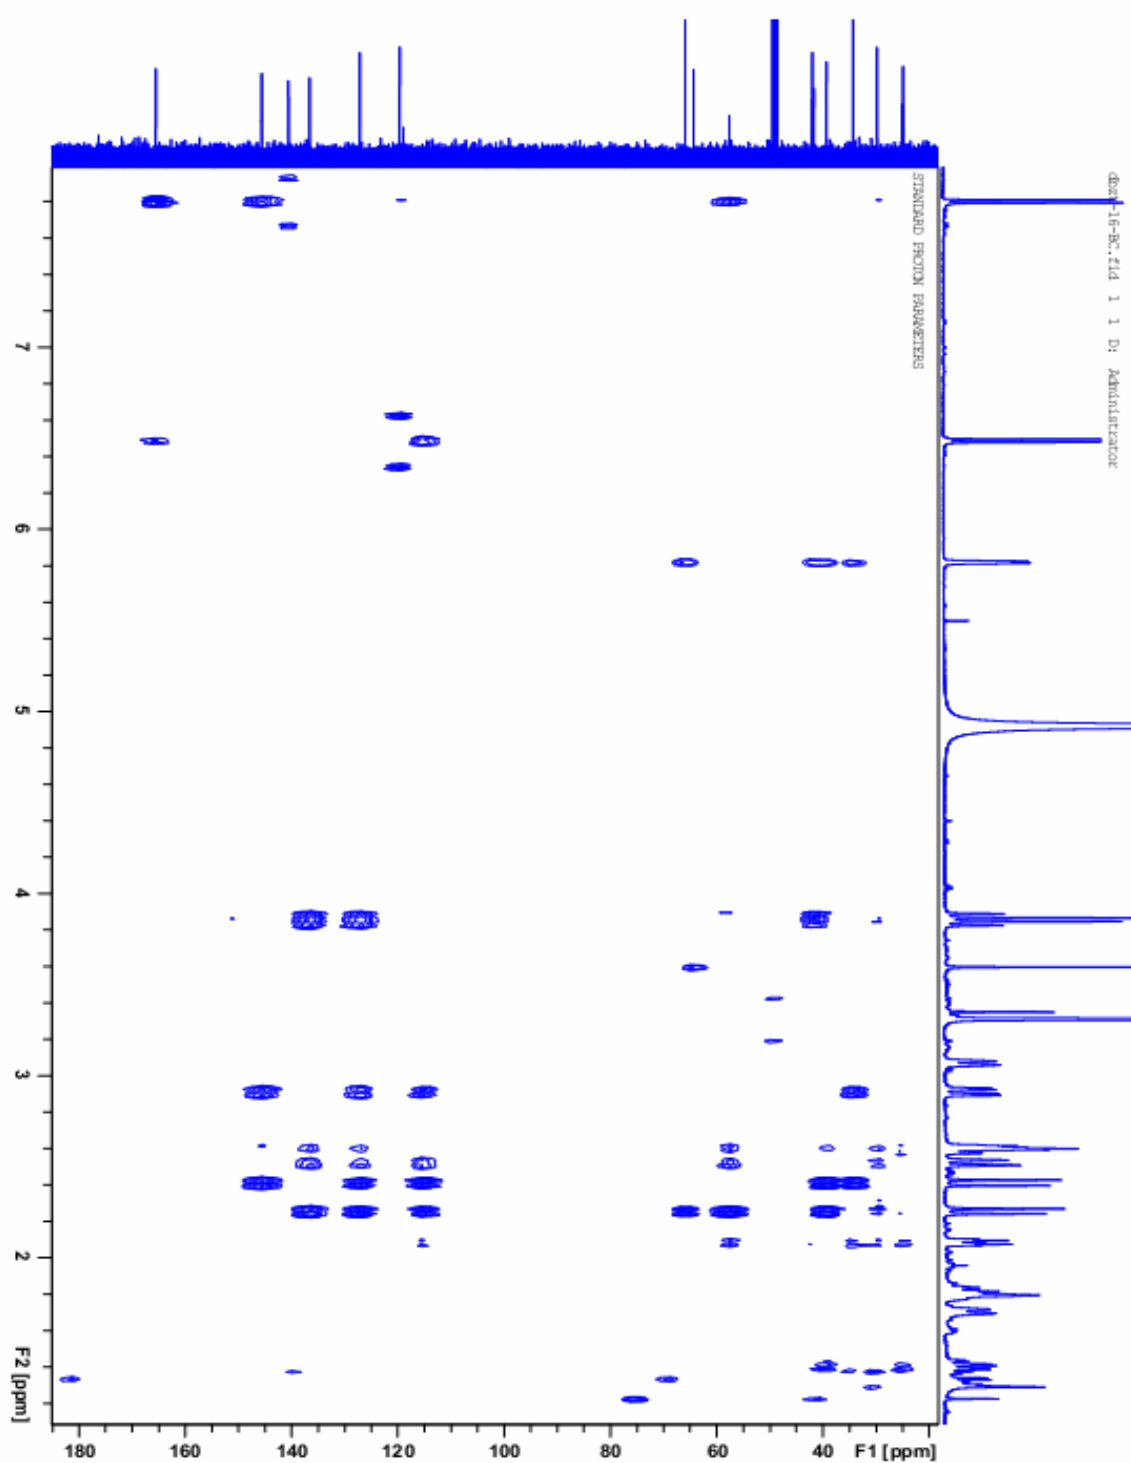

Figure S6. HRESIMS spectrum of compound 1.

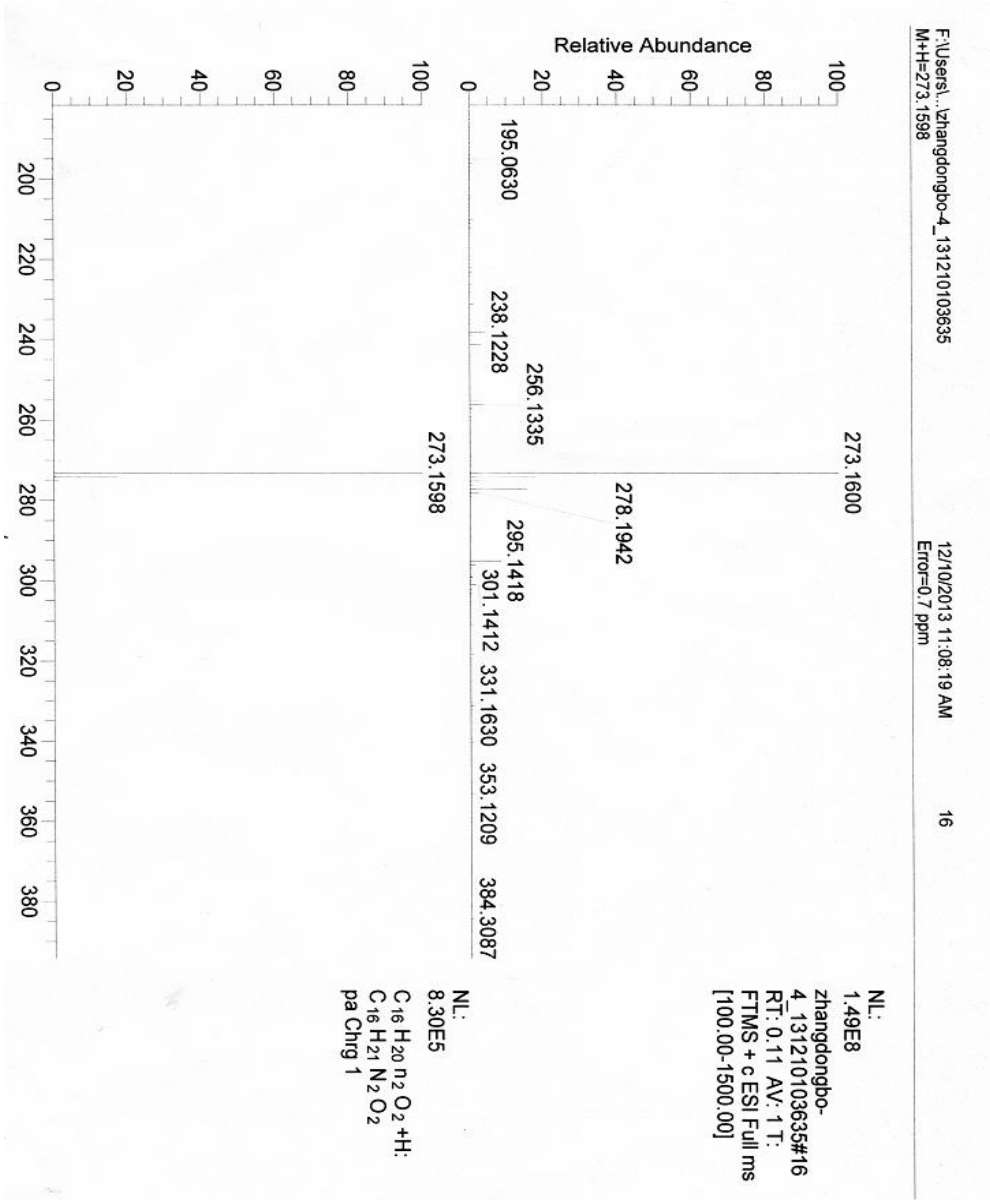

**Figure S7.**  $^1\text{H}$ -NMR spectrum of compound **2**.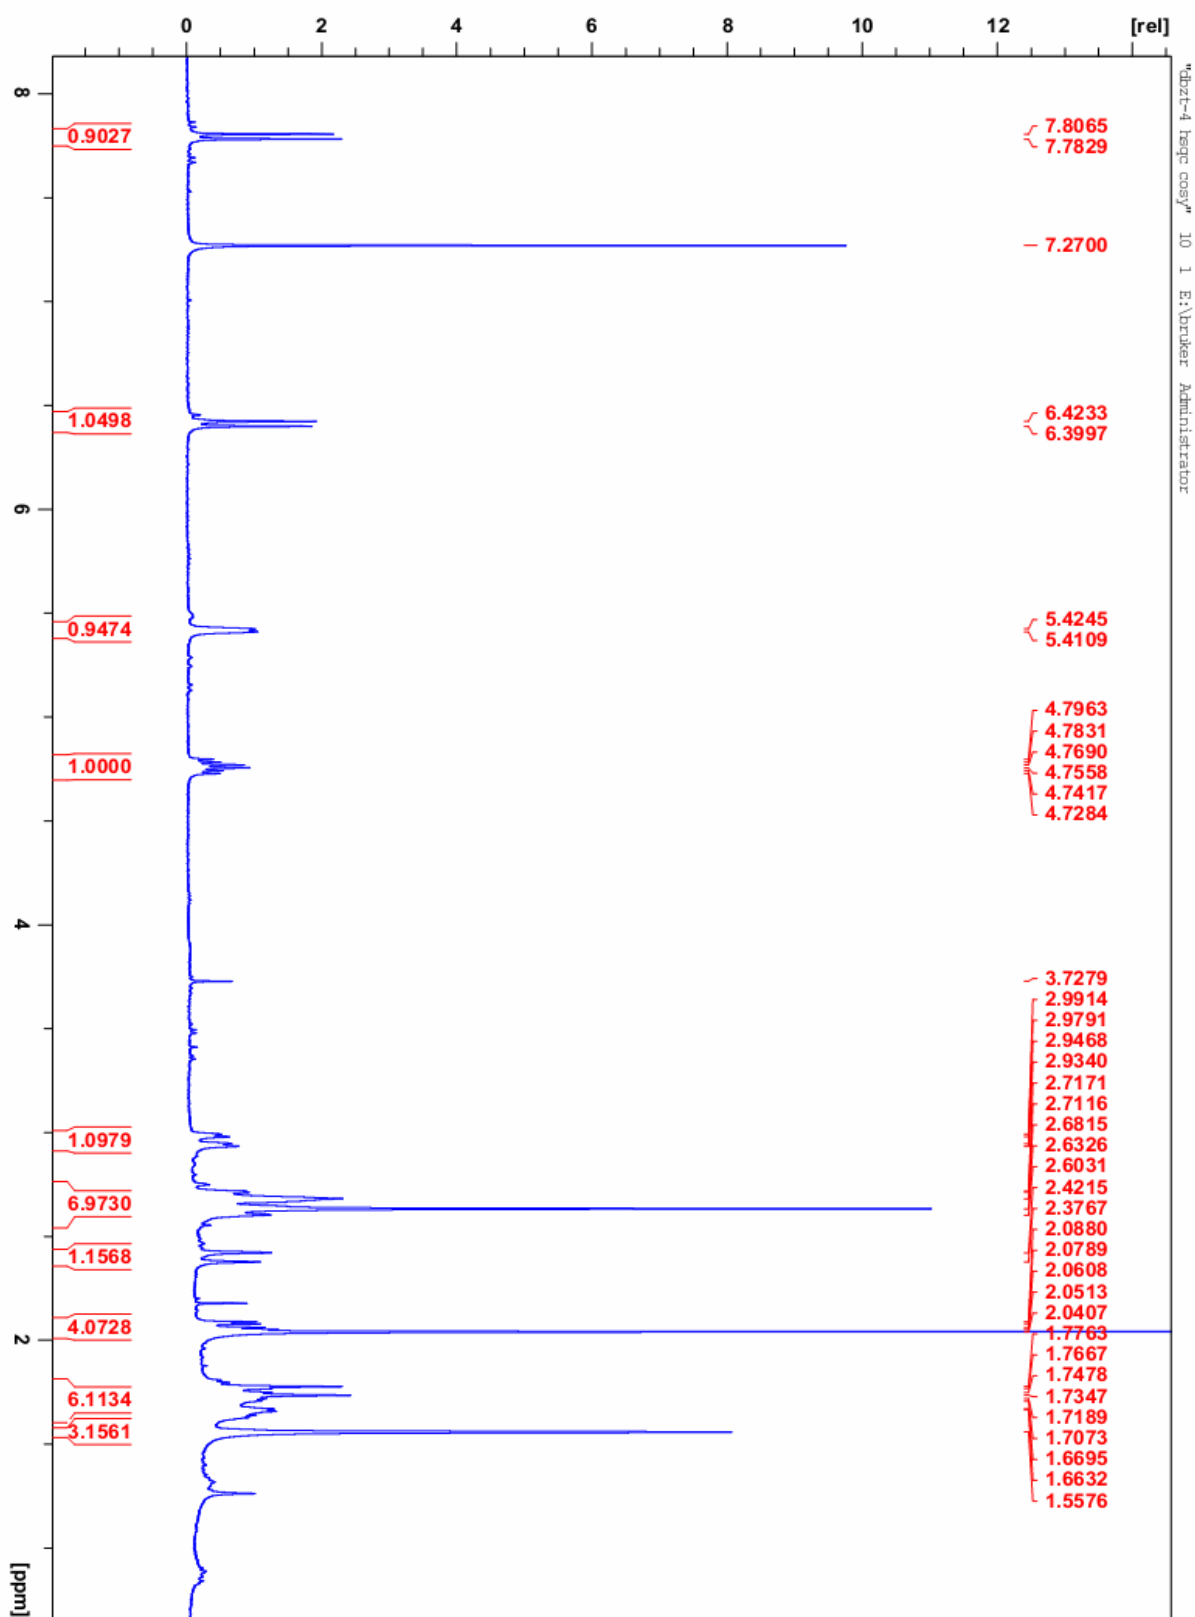

**Figure S8.**  $^{13}\text{C}$ -NMR spectrum of compound **2**.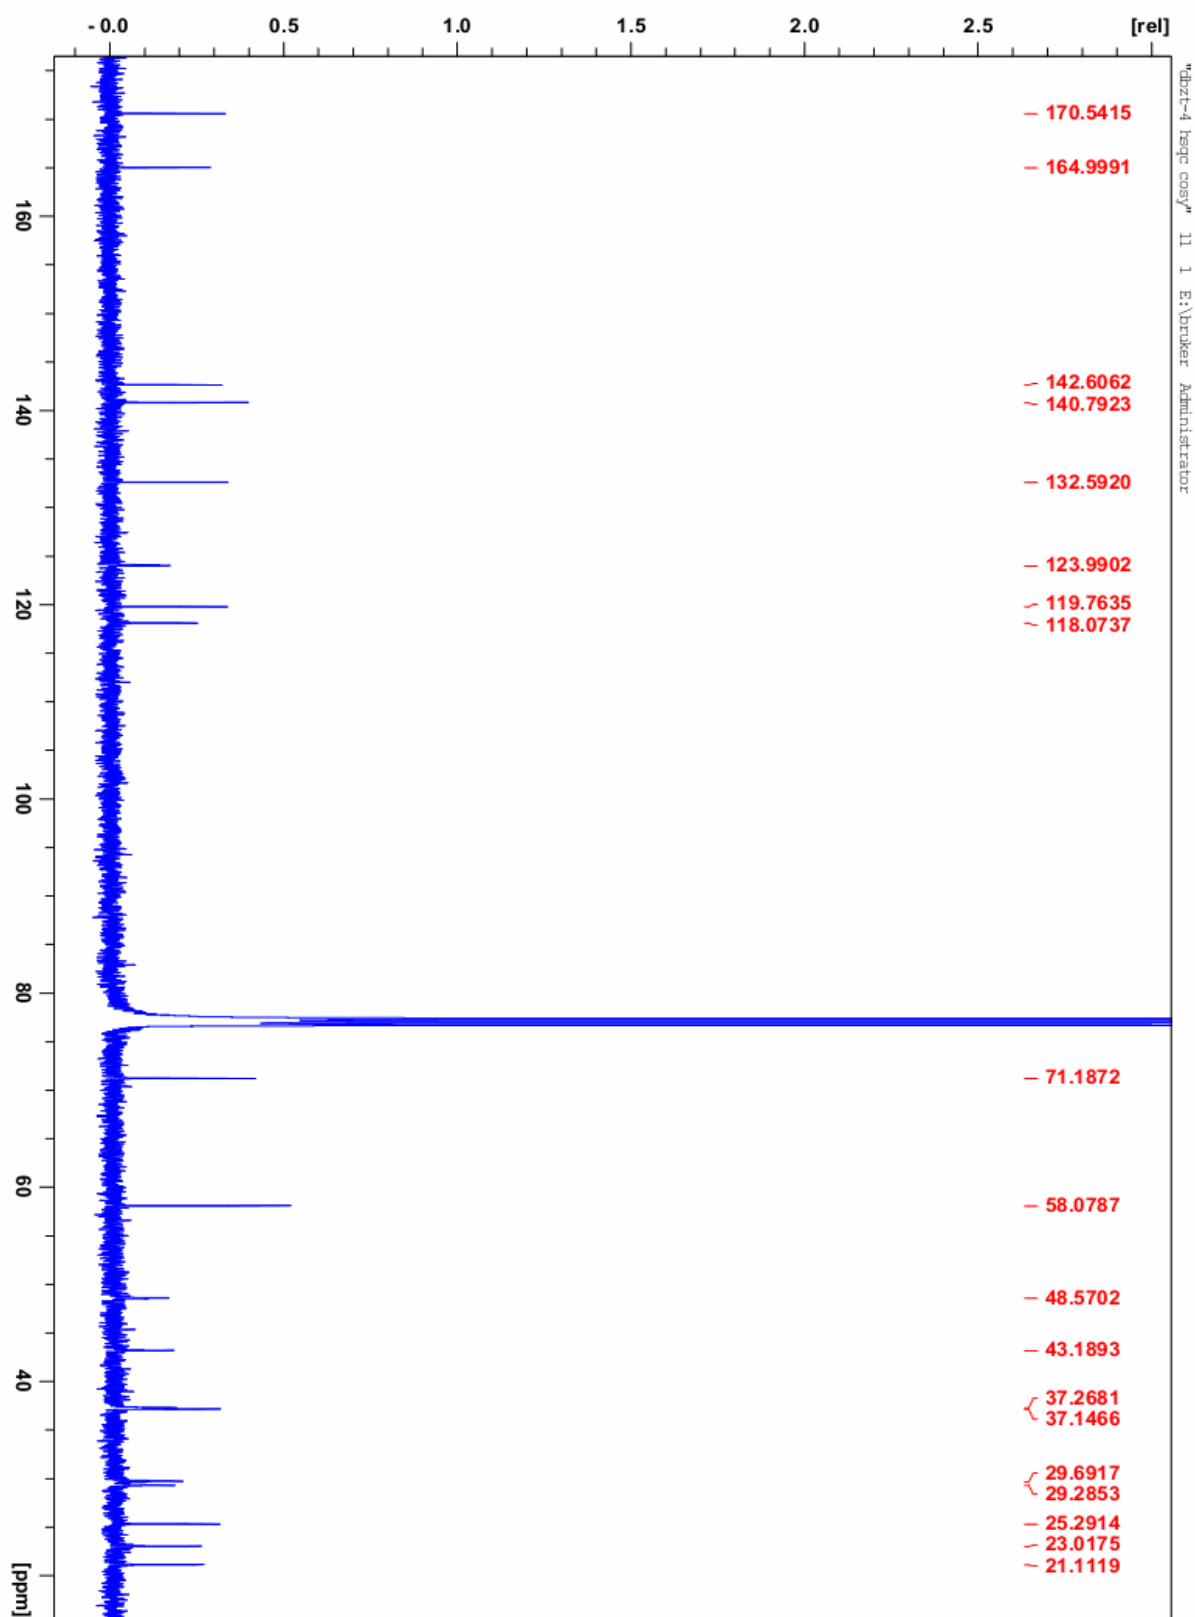





Figure S10. HSQC spectrum of compound 2.

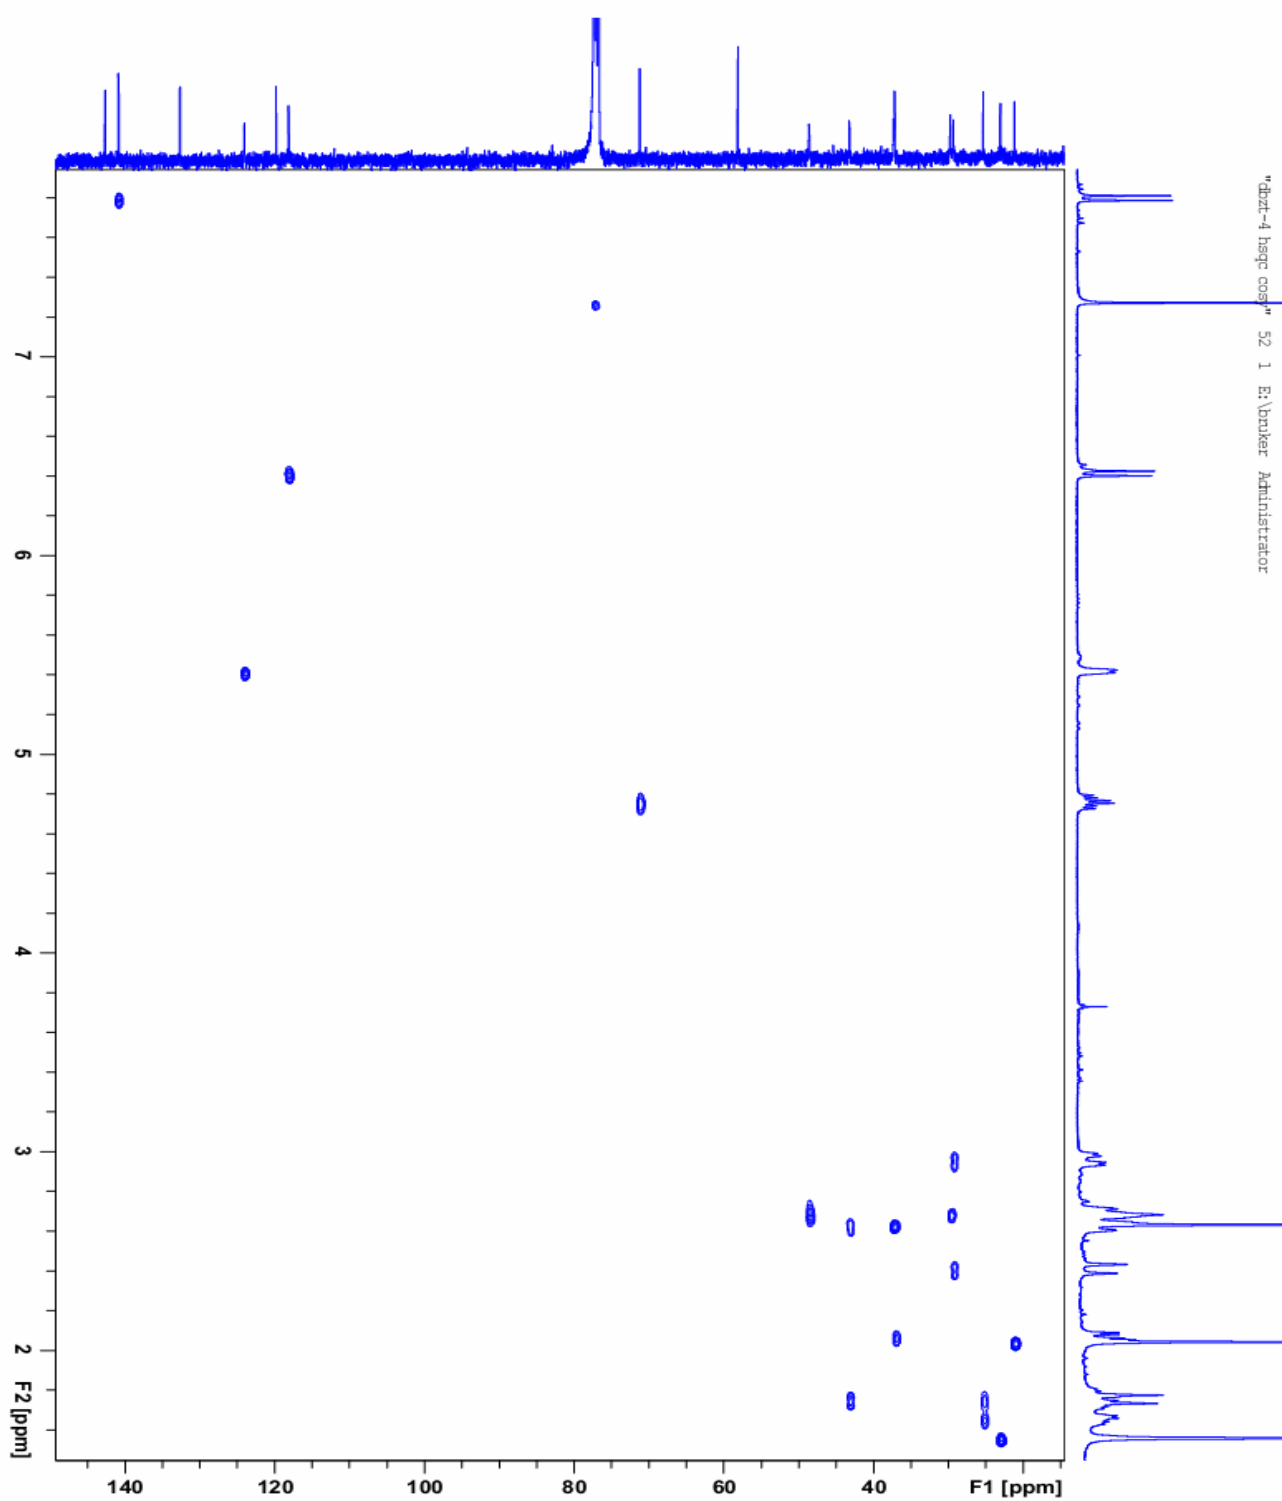

Figure S11. HMBC spectrum of compound 2.

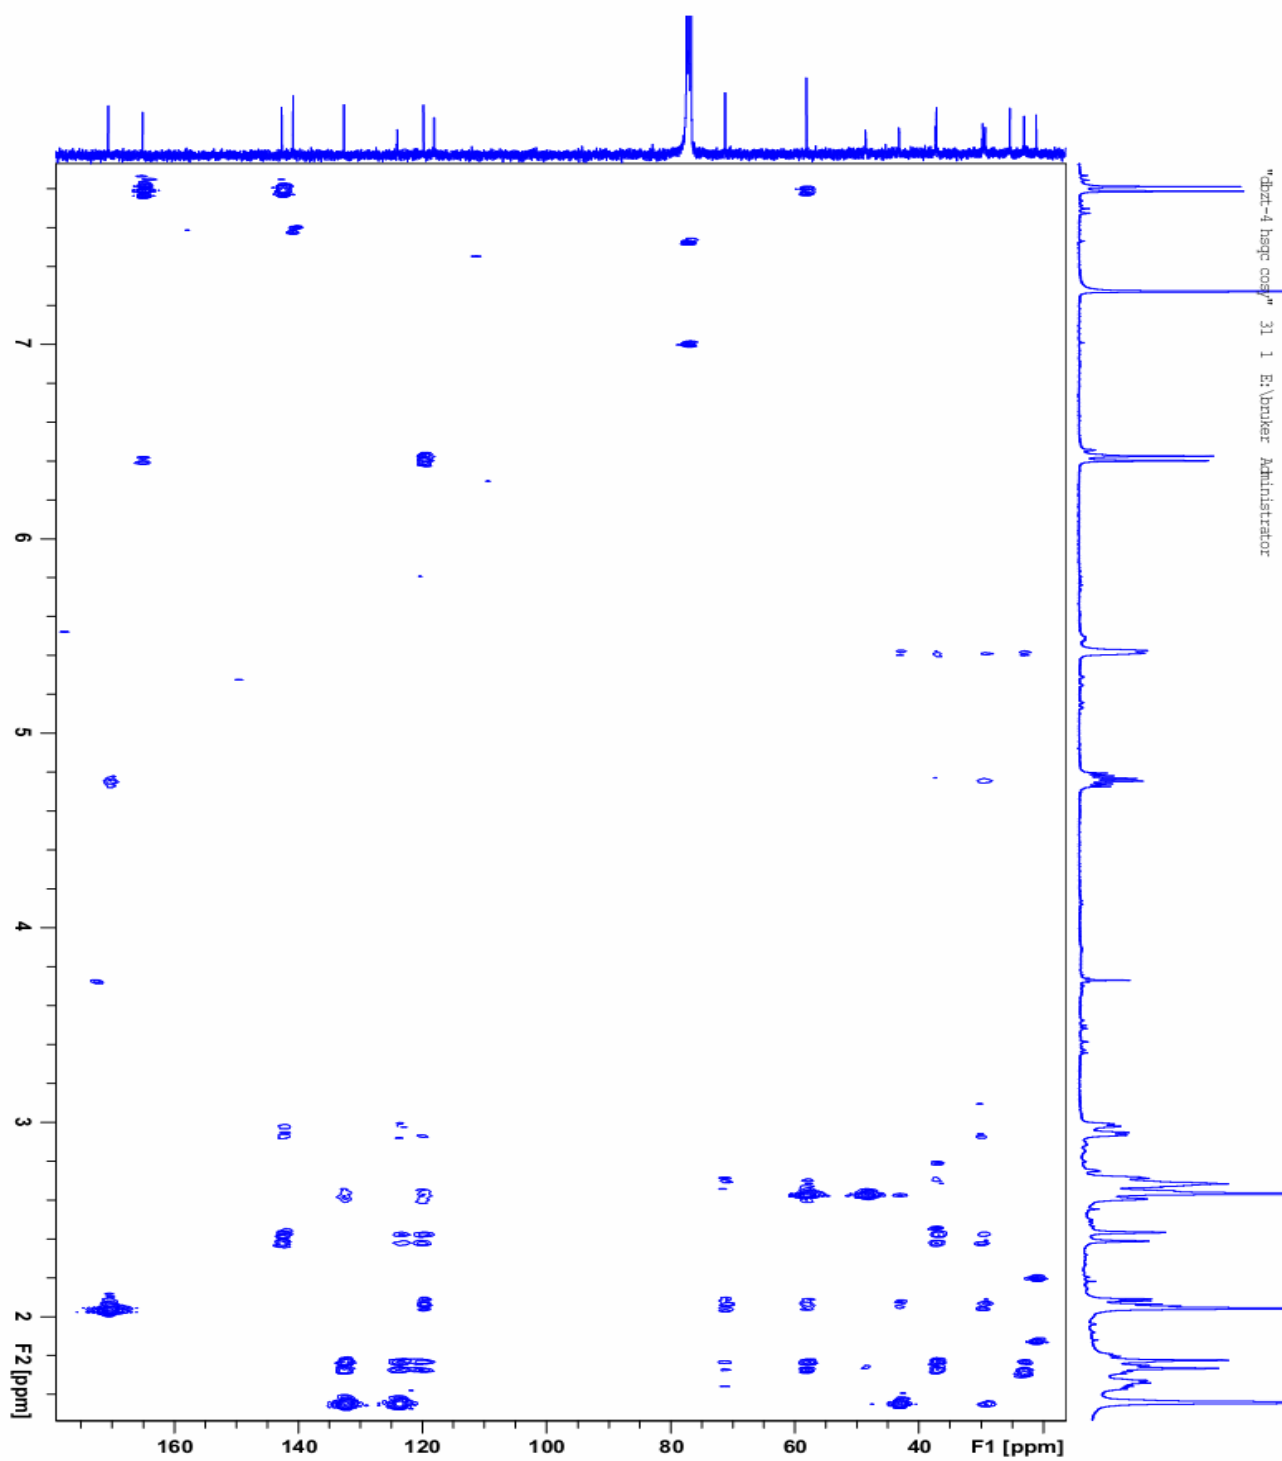

Figure S12. HRESIMS spectrum of compound 2.

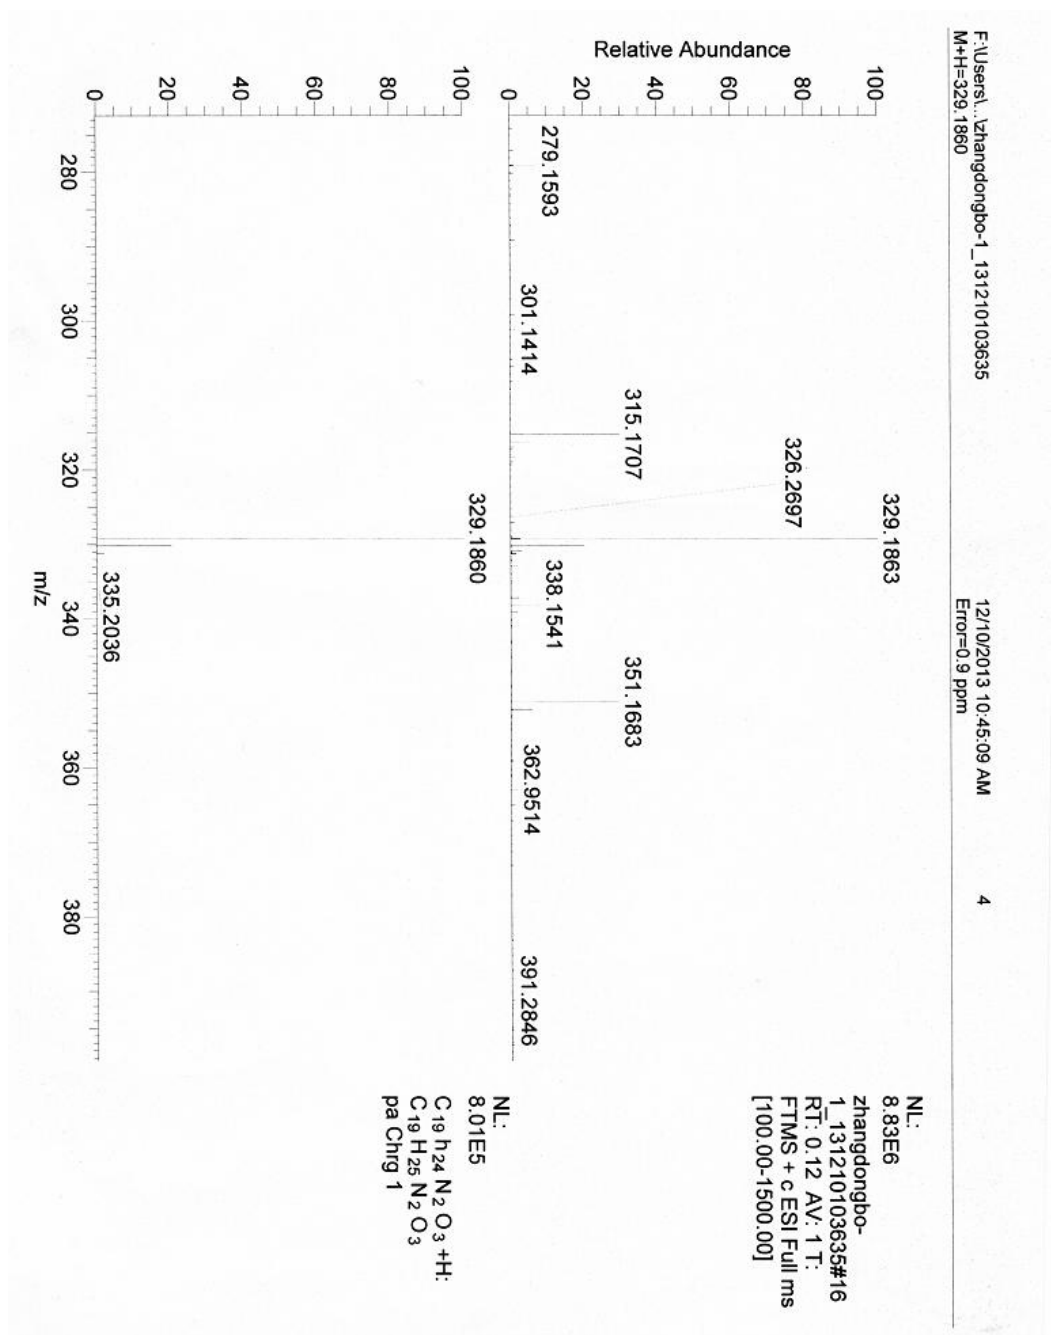

Figure S13.  $^1\text{H}$ -NMR spectrum of compound 3.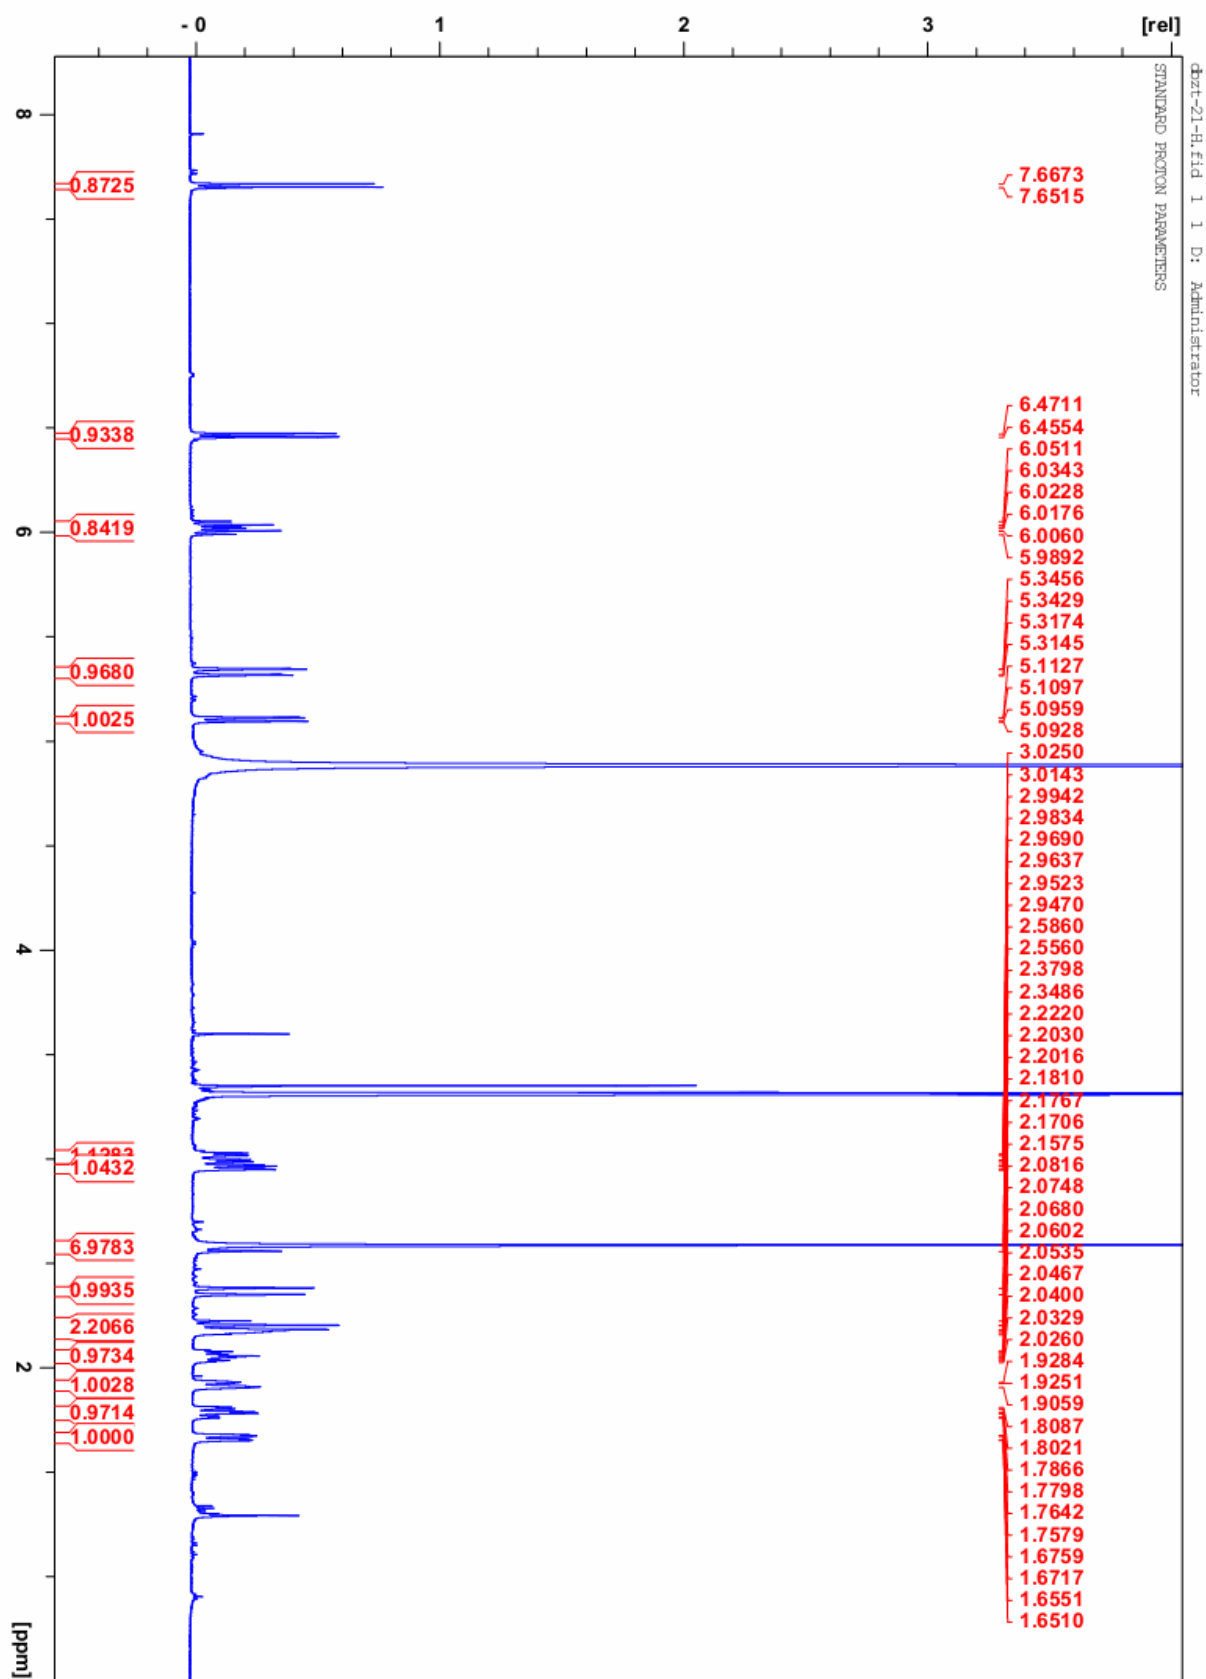

**Figure S14.**  $^{13}\text{C}$ -NMR spectrum of compound 3.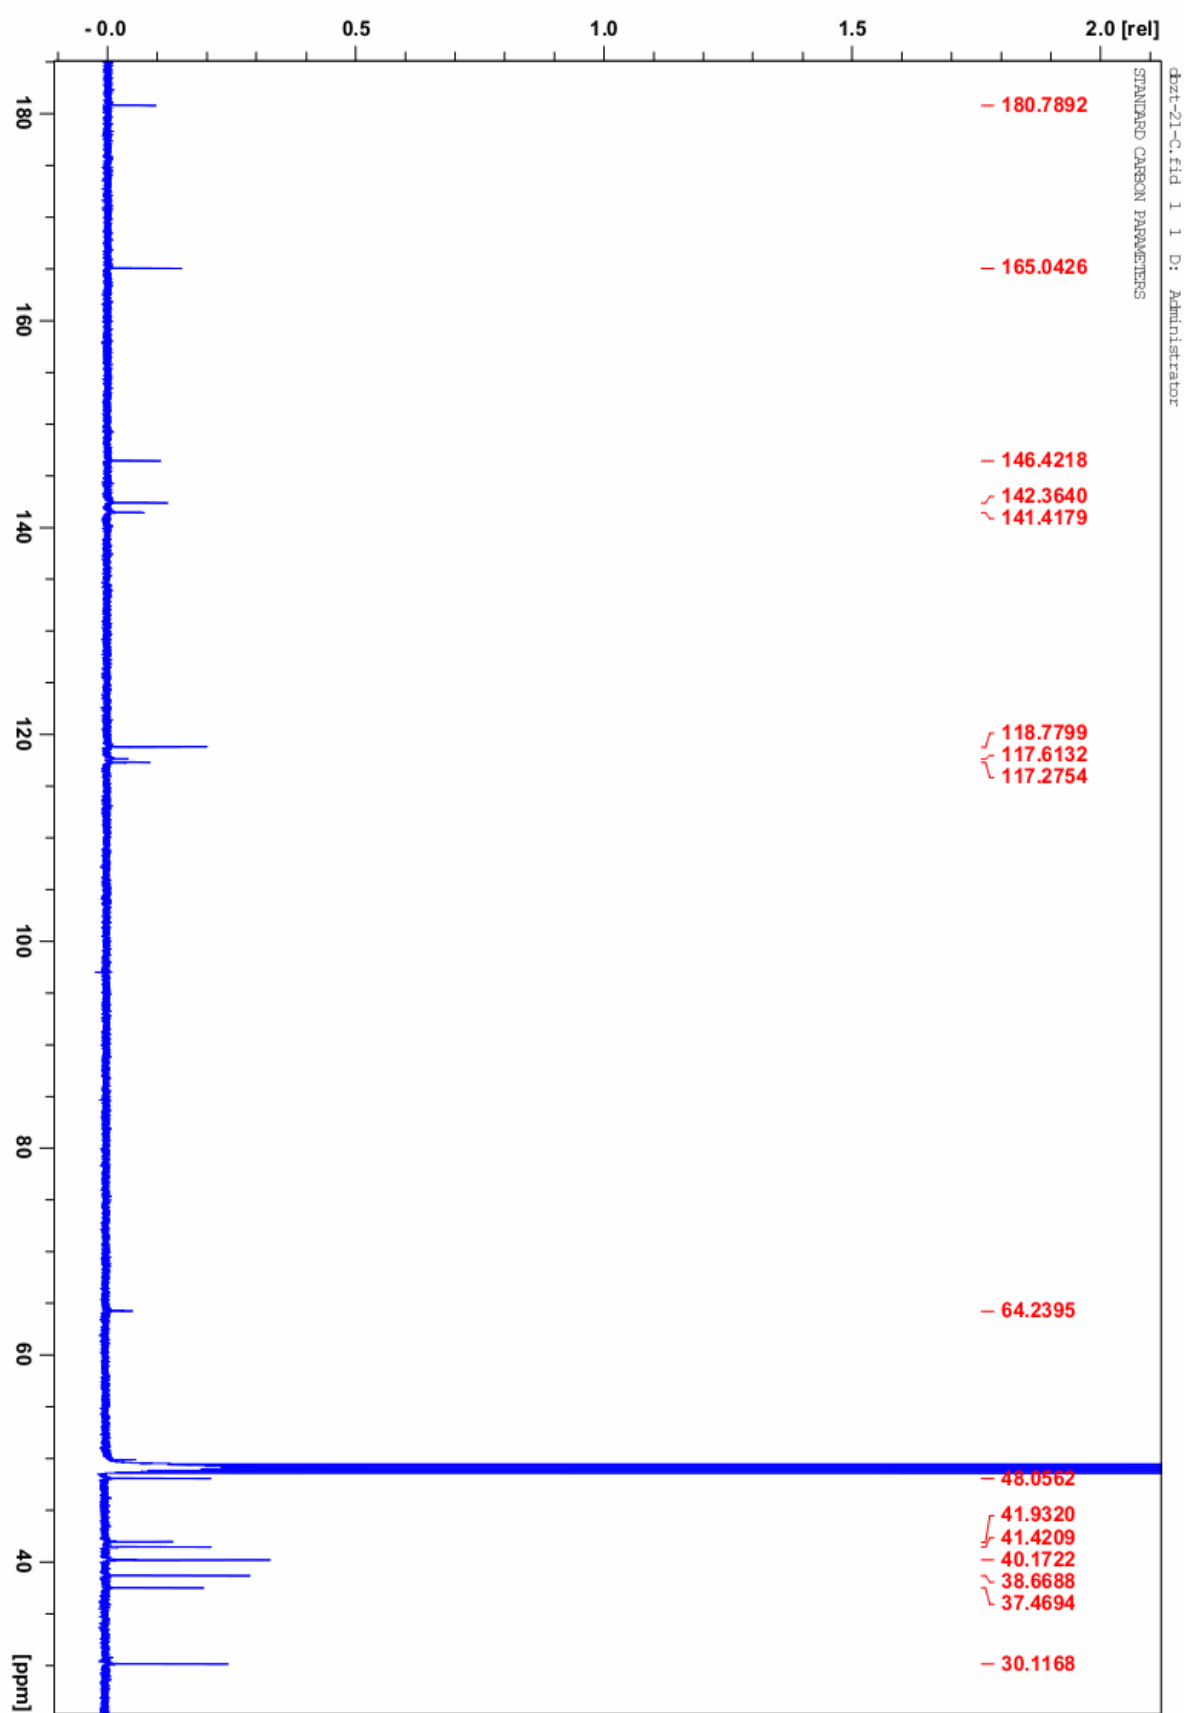

**Figure S15.**  $^1\text{H}$ - $^1\text{H}$  COSY spectrum of compound **3**.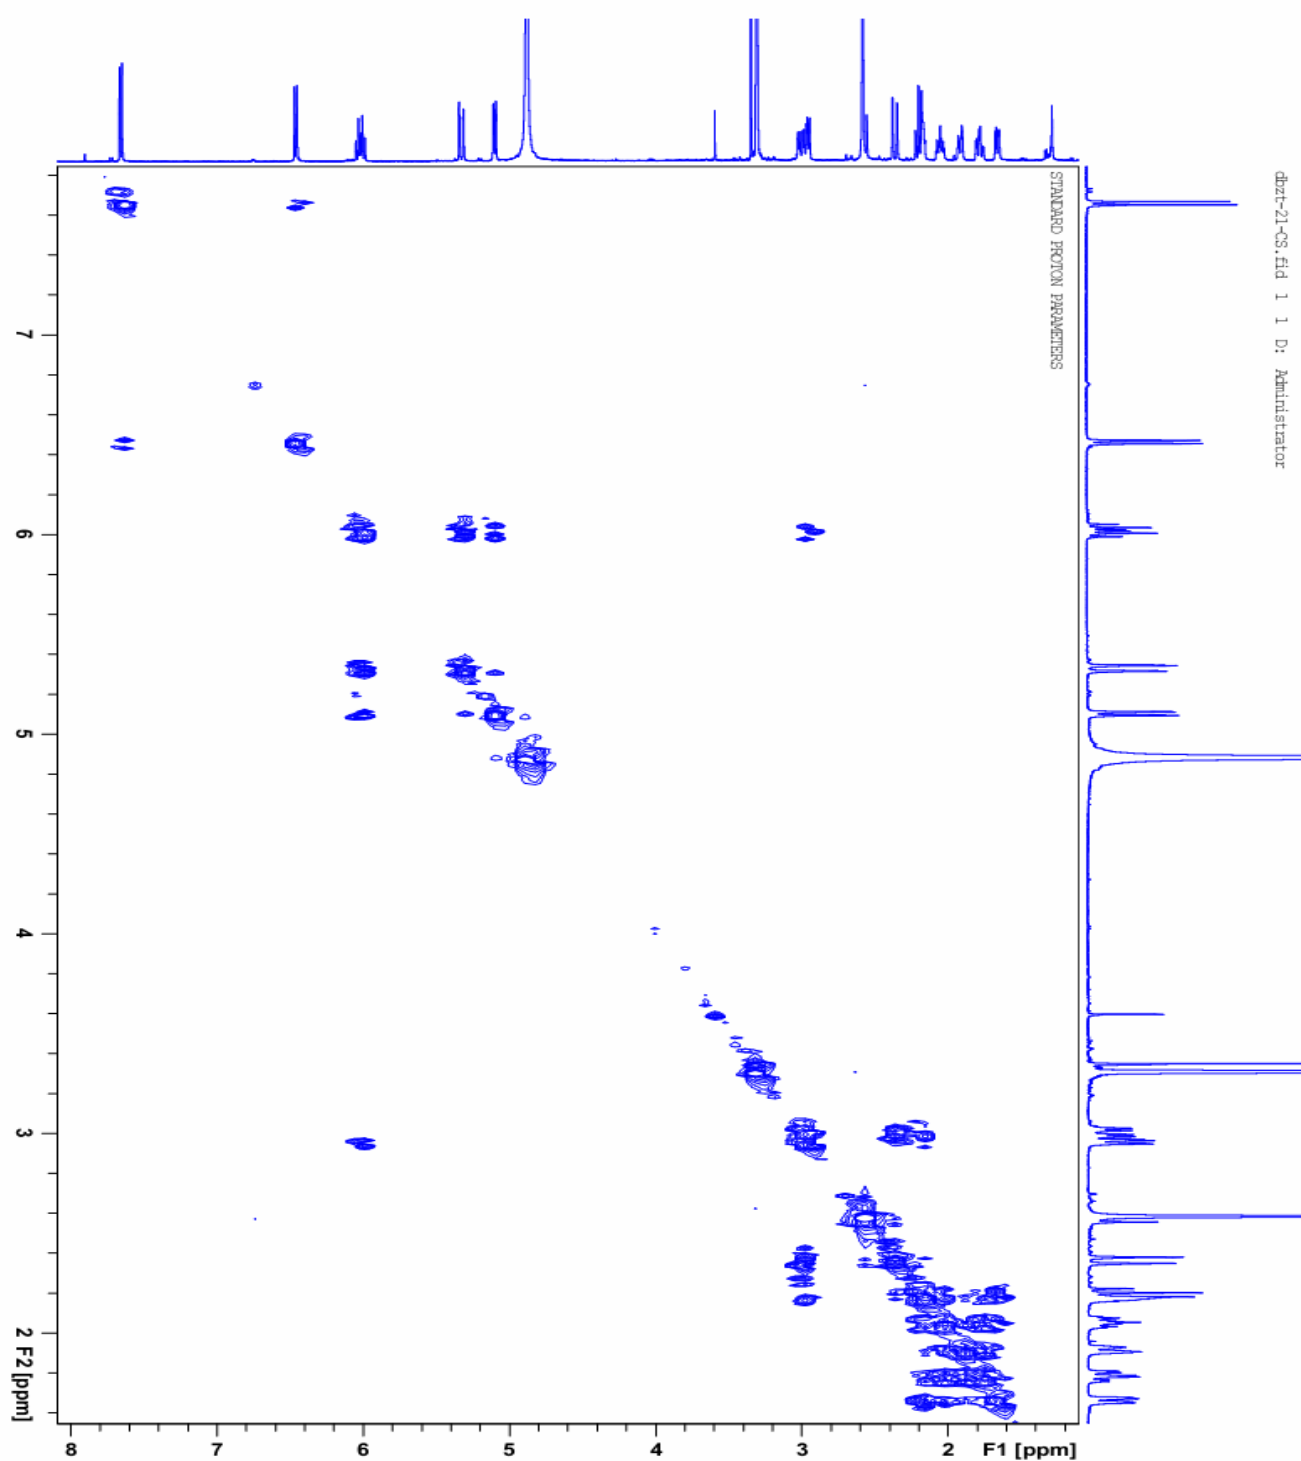

**Figure S16.** HSQC spectrum of compound **3**.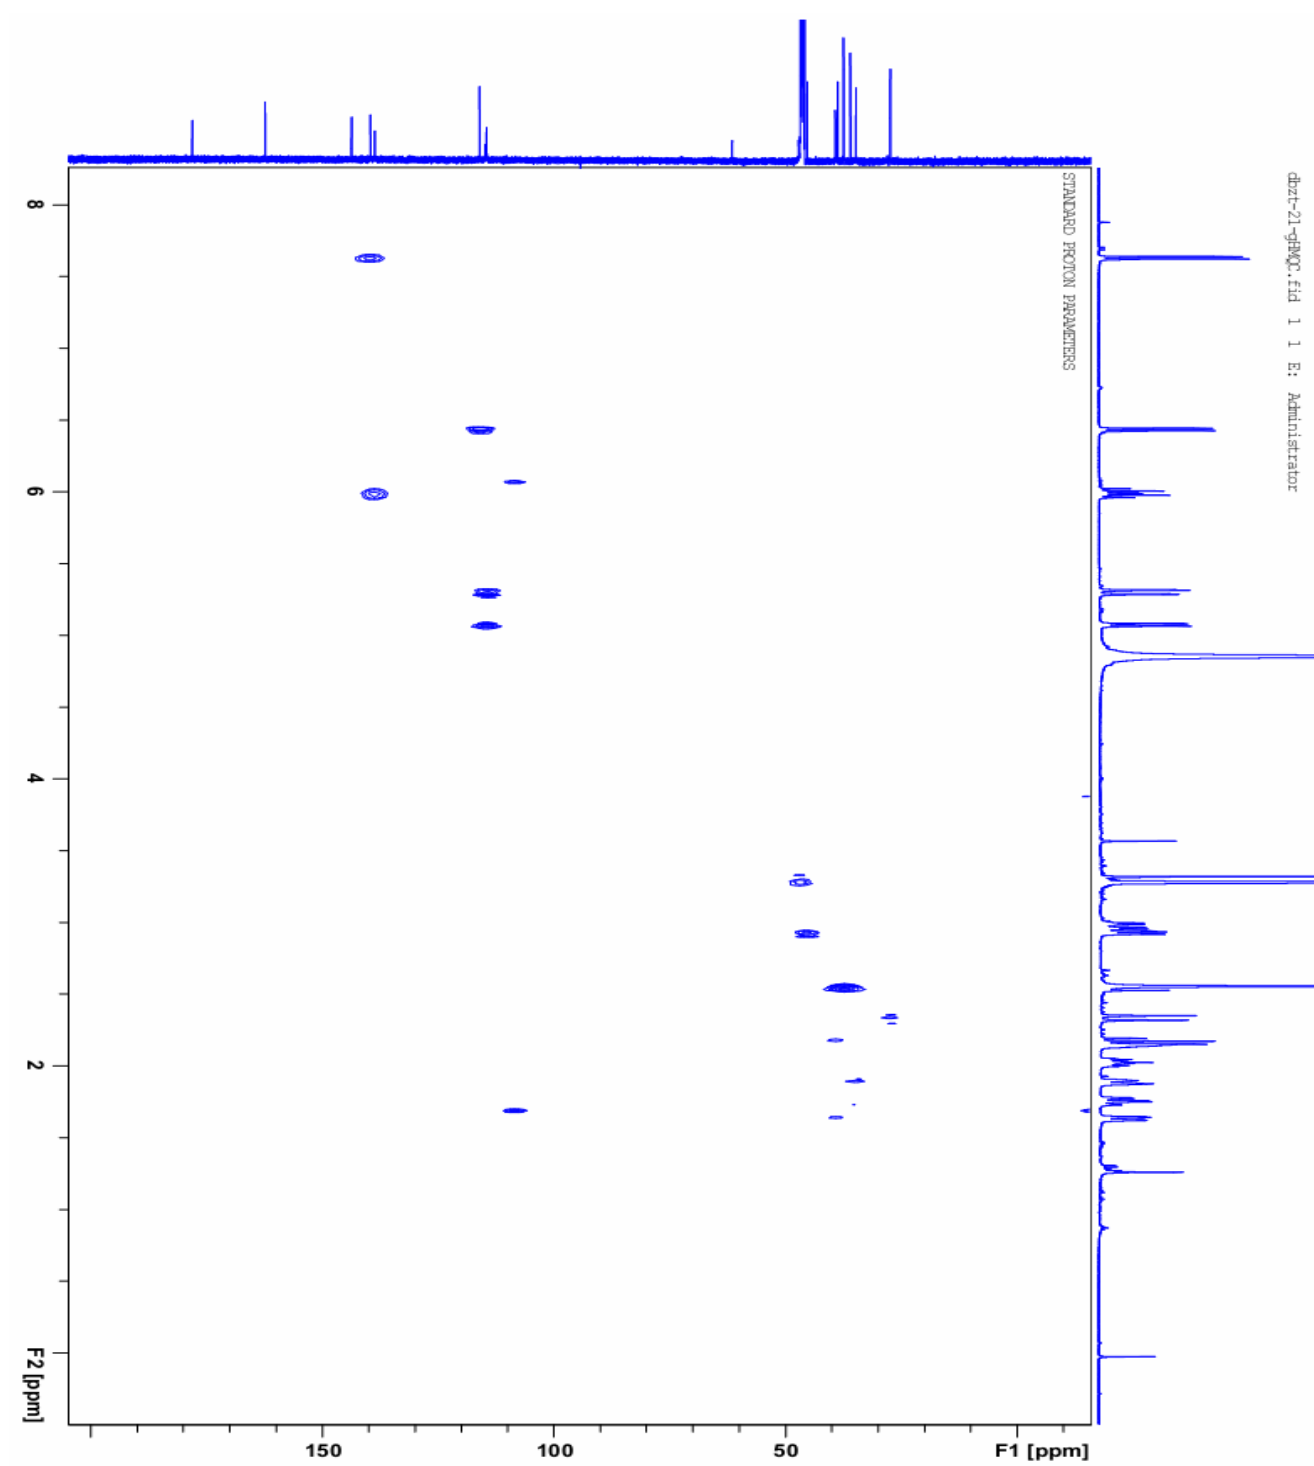



**Figure S17.** HMBC spectrum of compound **3**.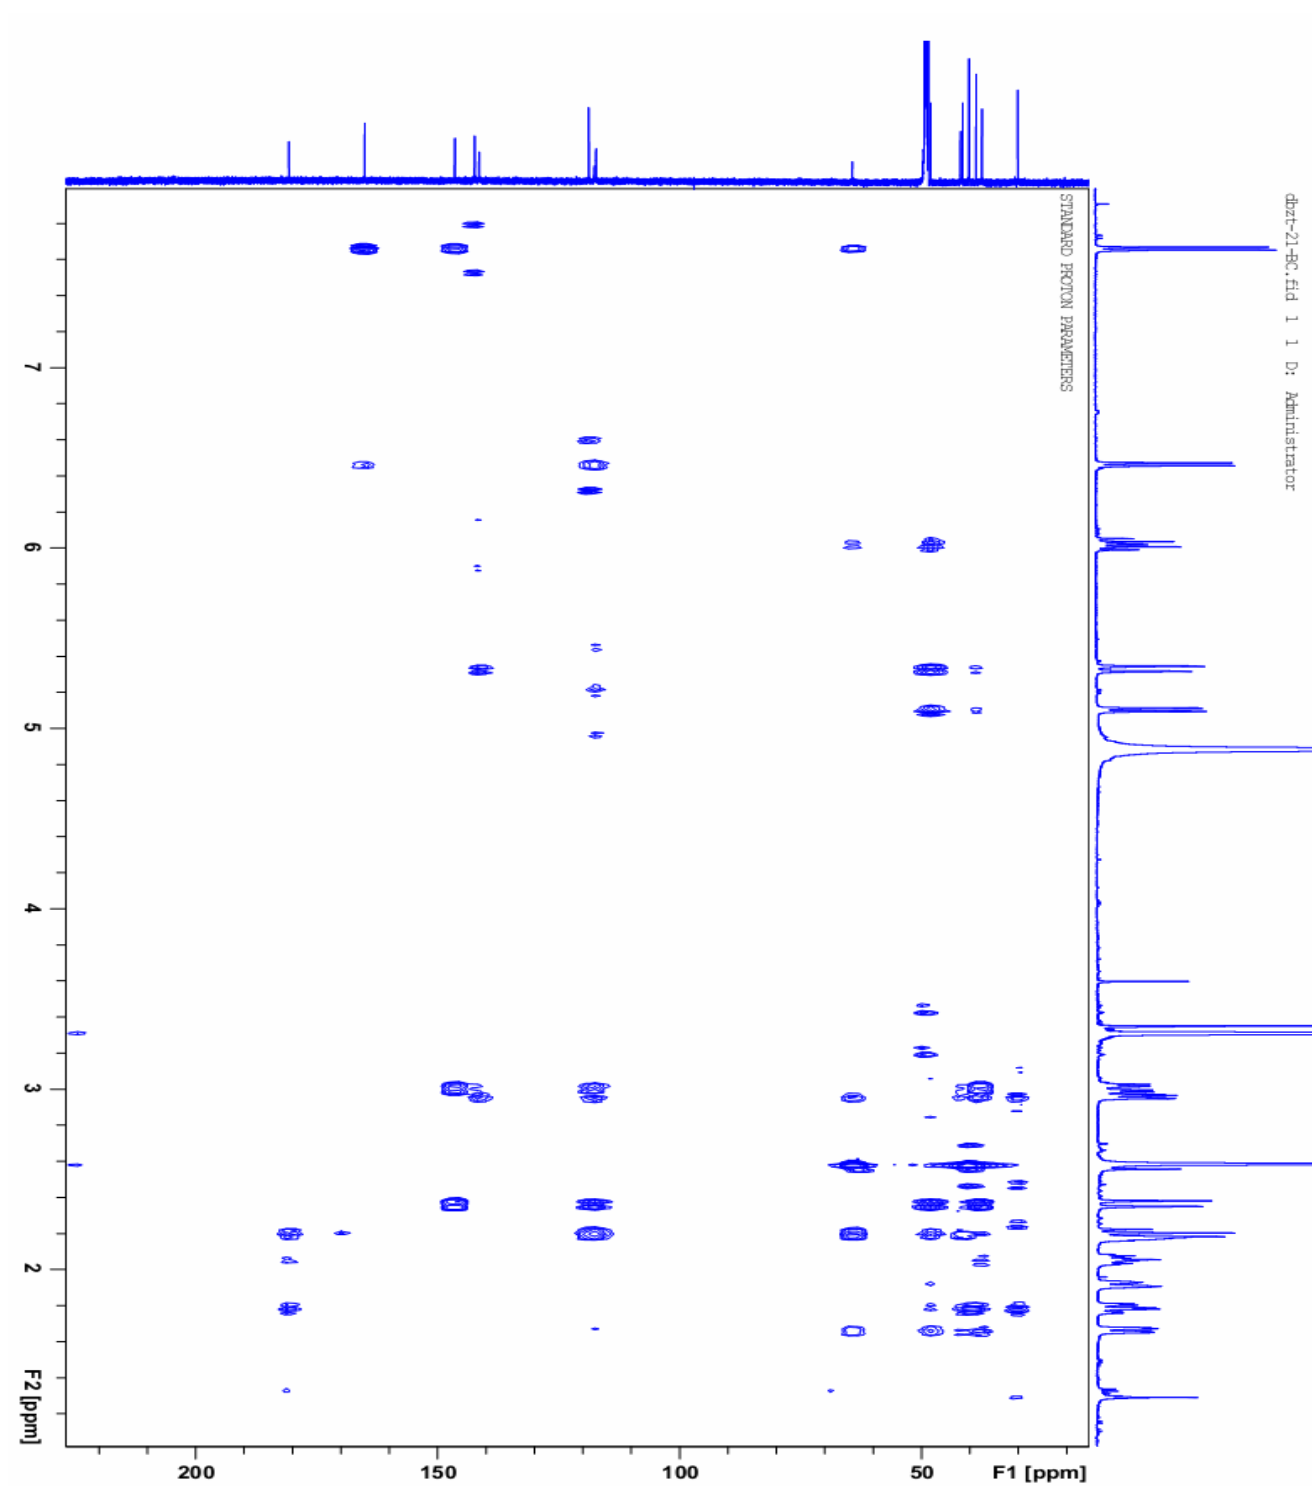

Figure S18. HRESIMS spectrum of compound 3.

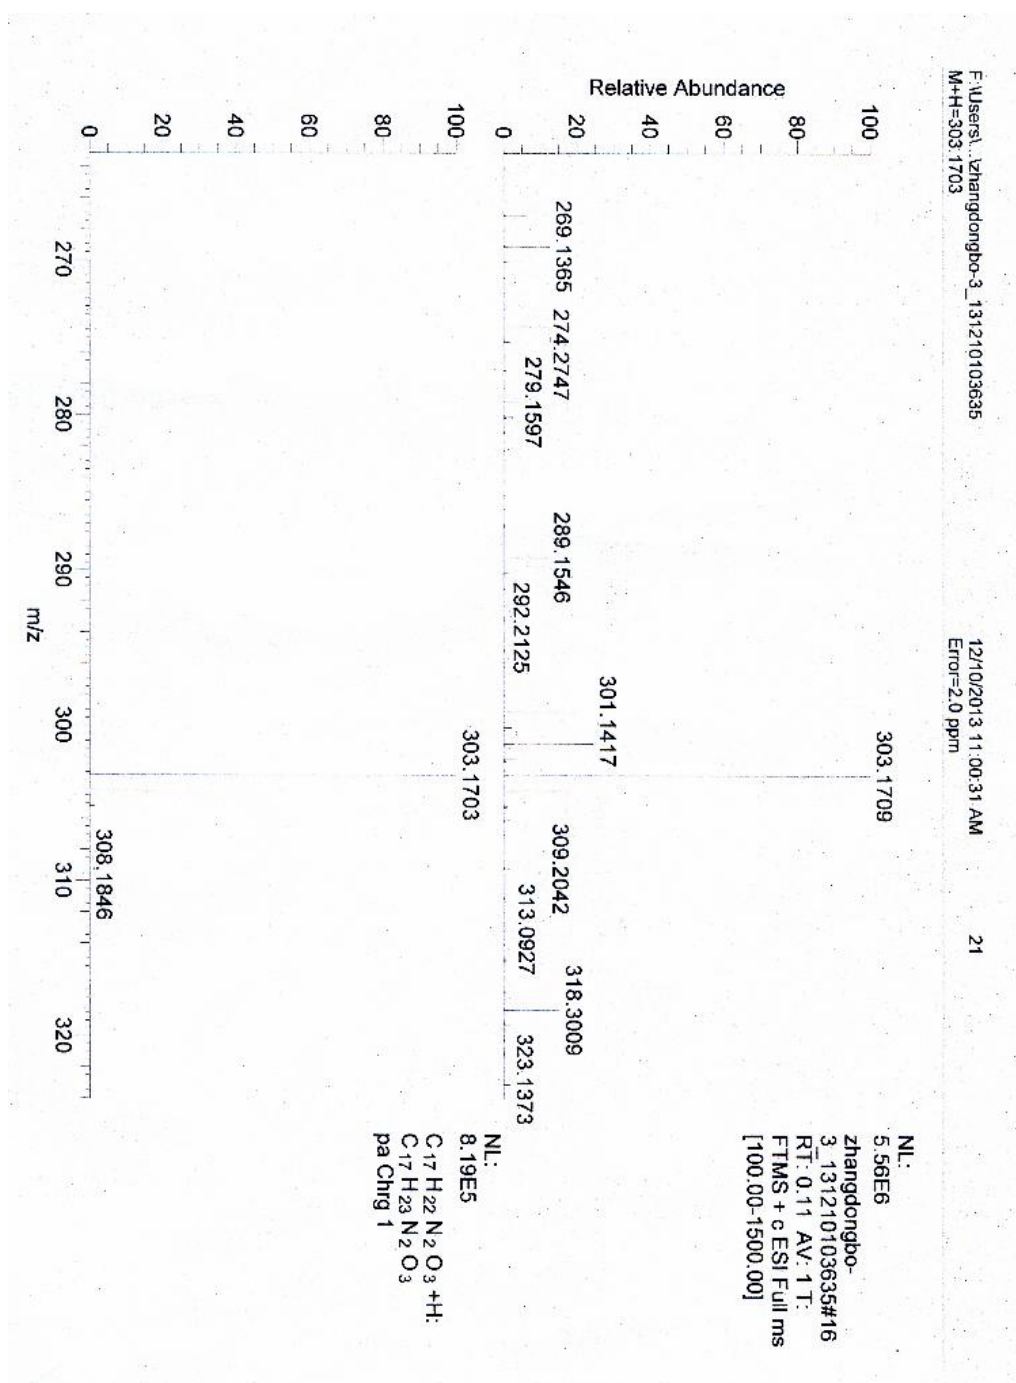

Figure S19.  $^1\text{H}$ -NMR spectrum of compound 4.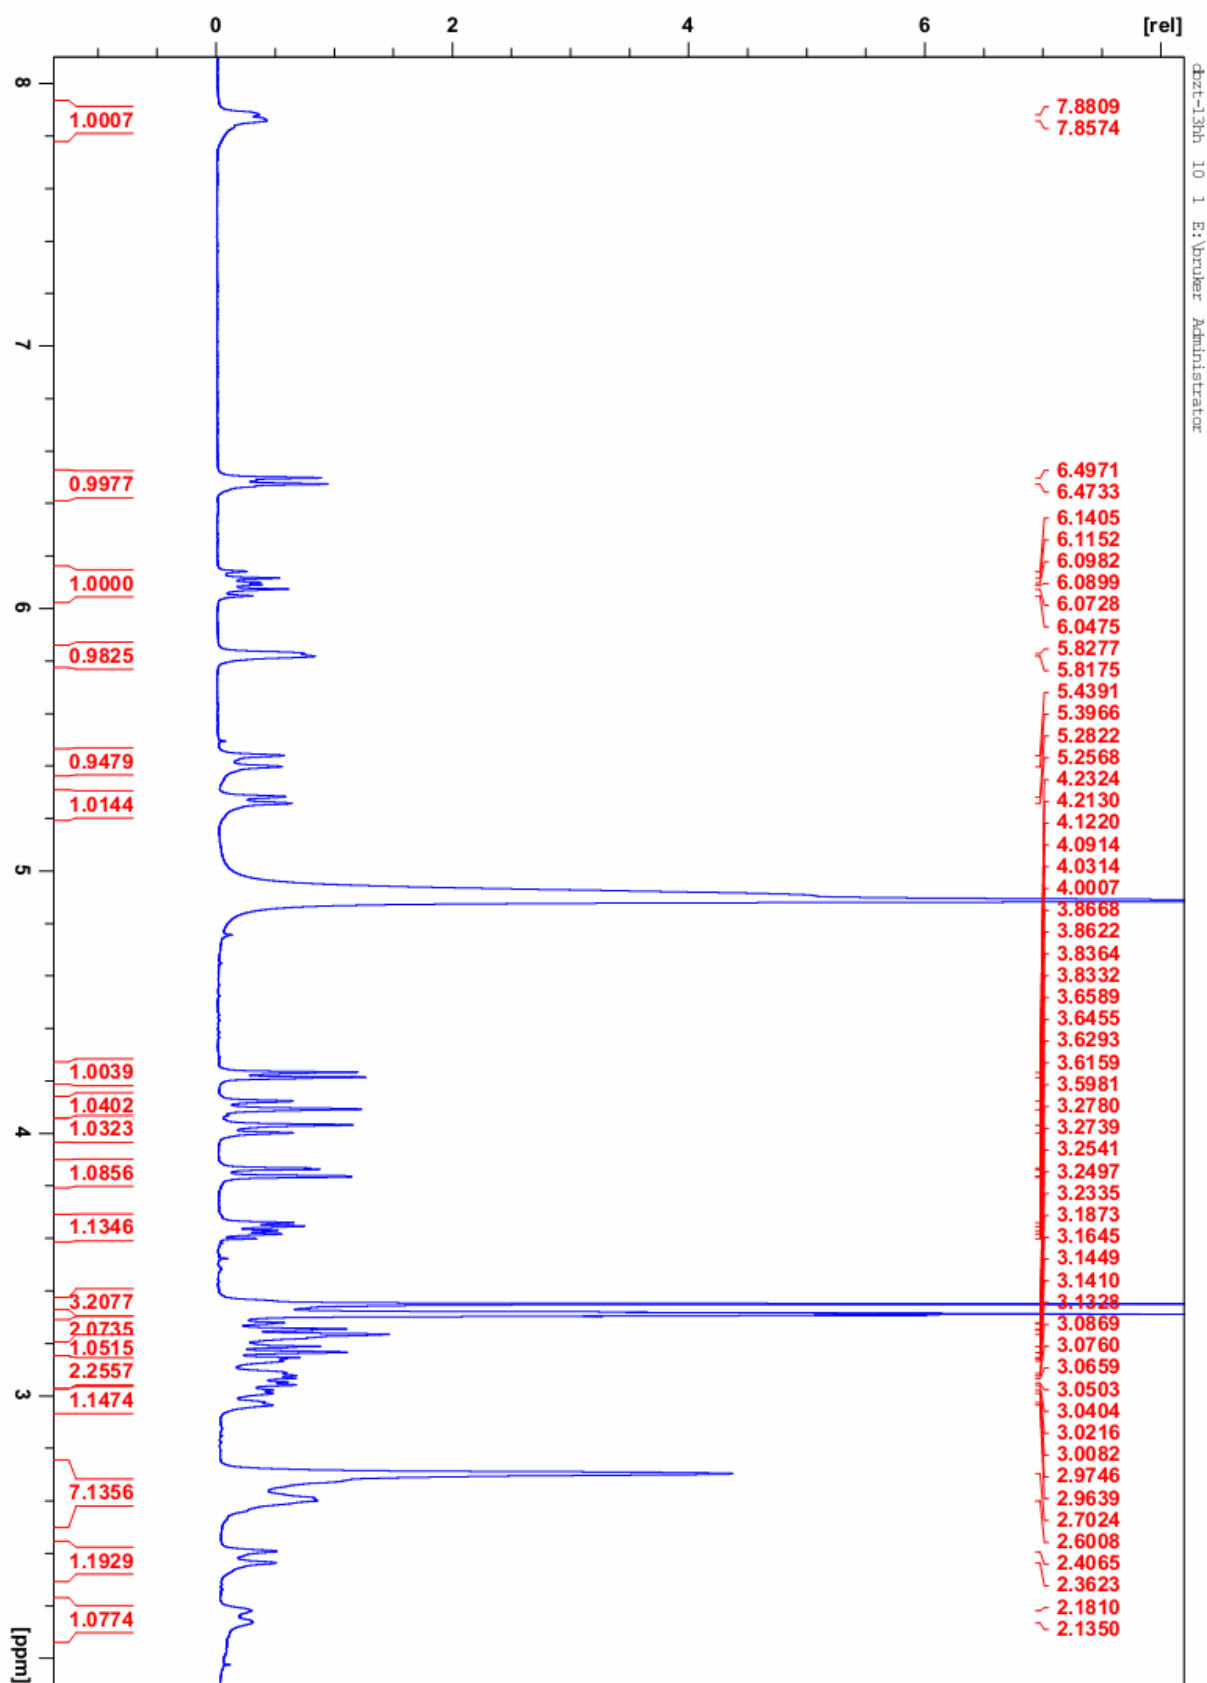

**Figure S20.**  $^{13}\text{C}$ -NMR spectrum of compound **4**.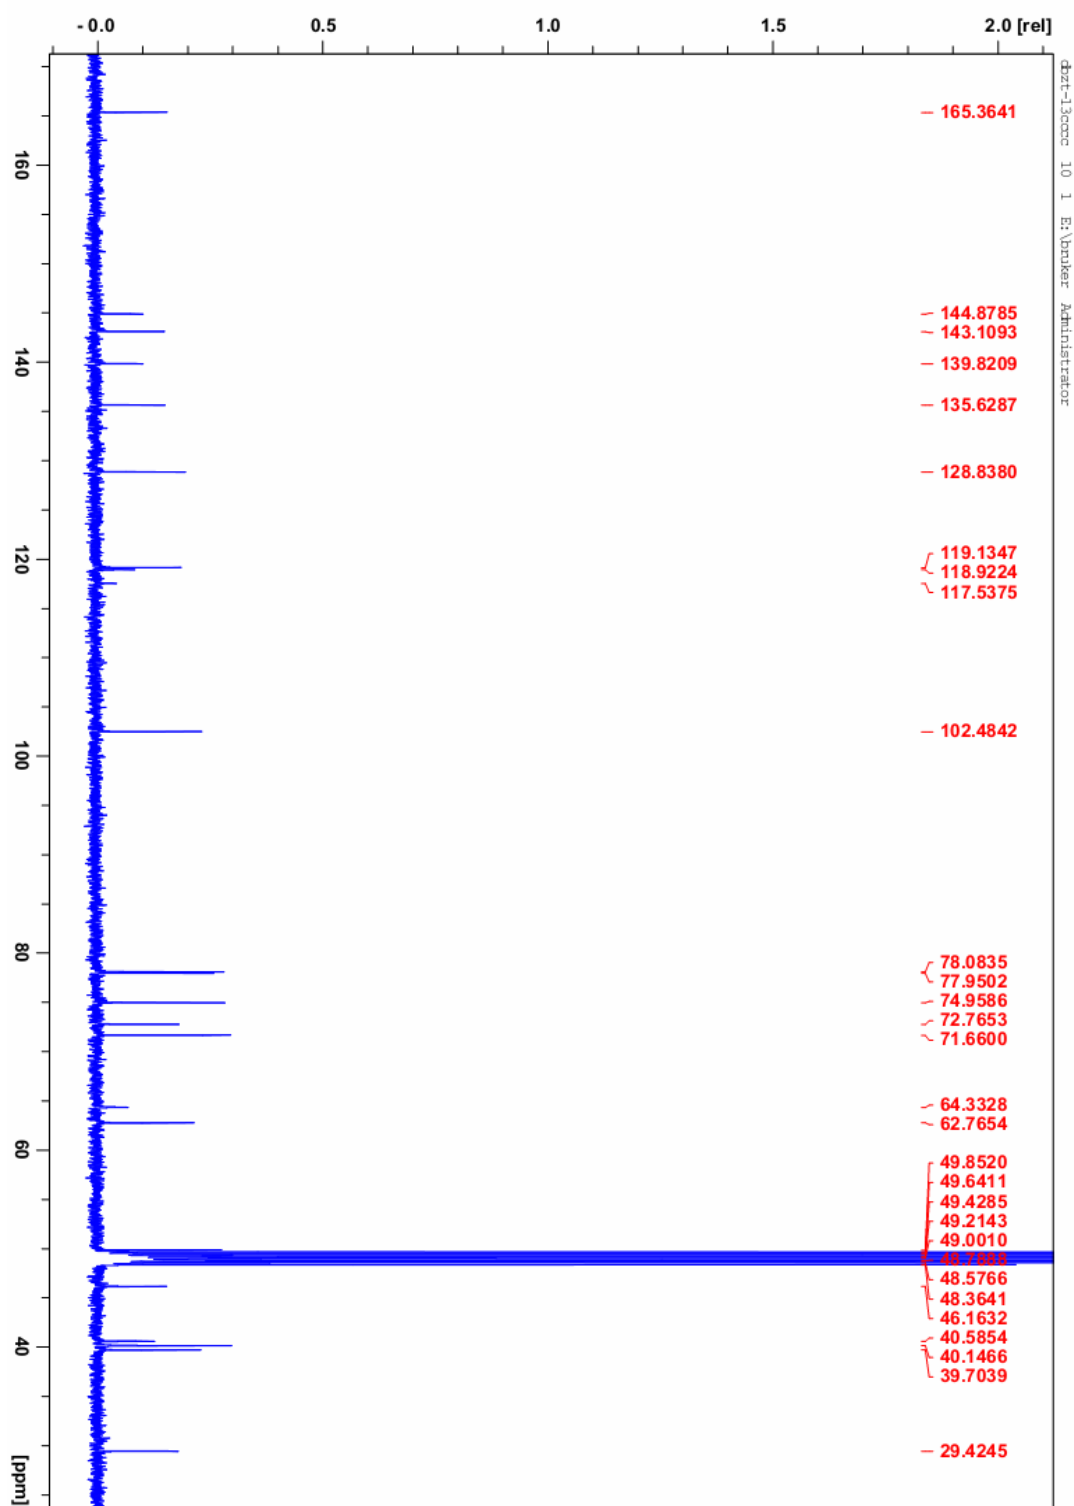

**Figure S21.**  $^1\text{H}$ - $^1\text{H}$  COSY spectrum of compound **4**.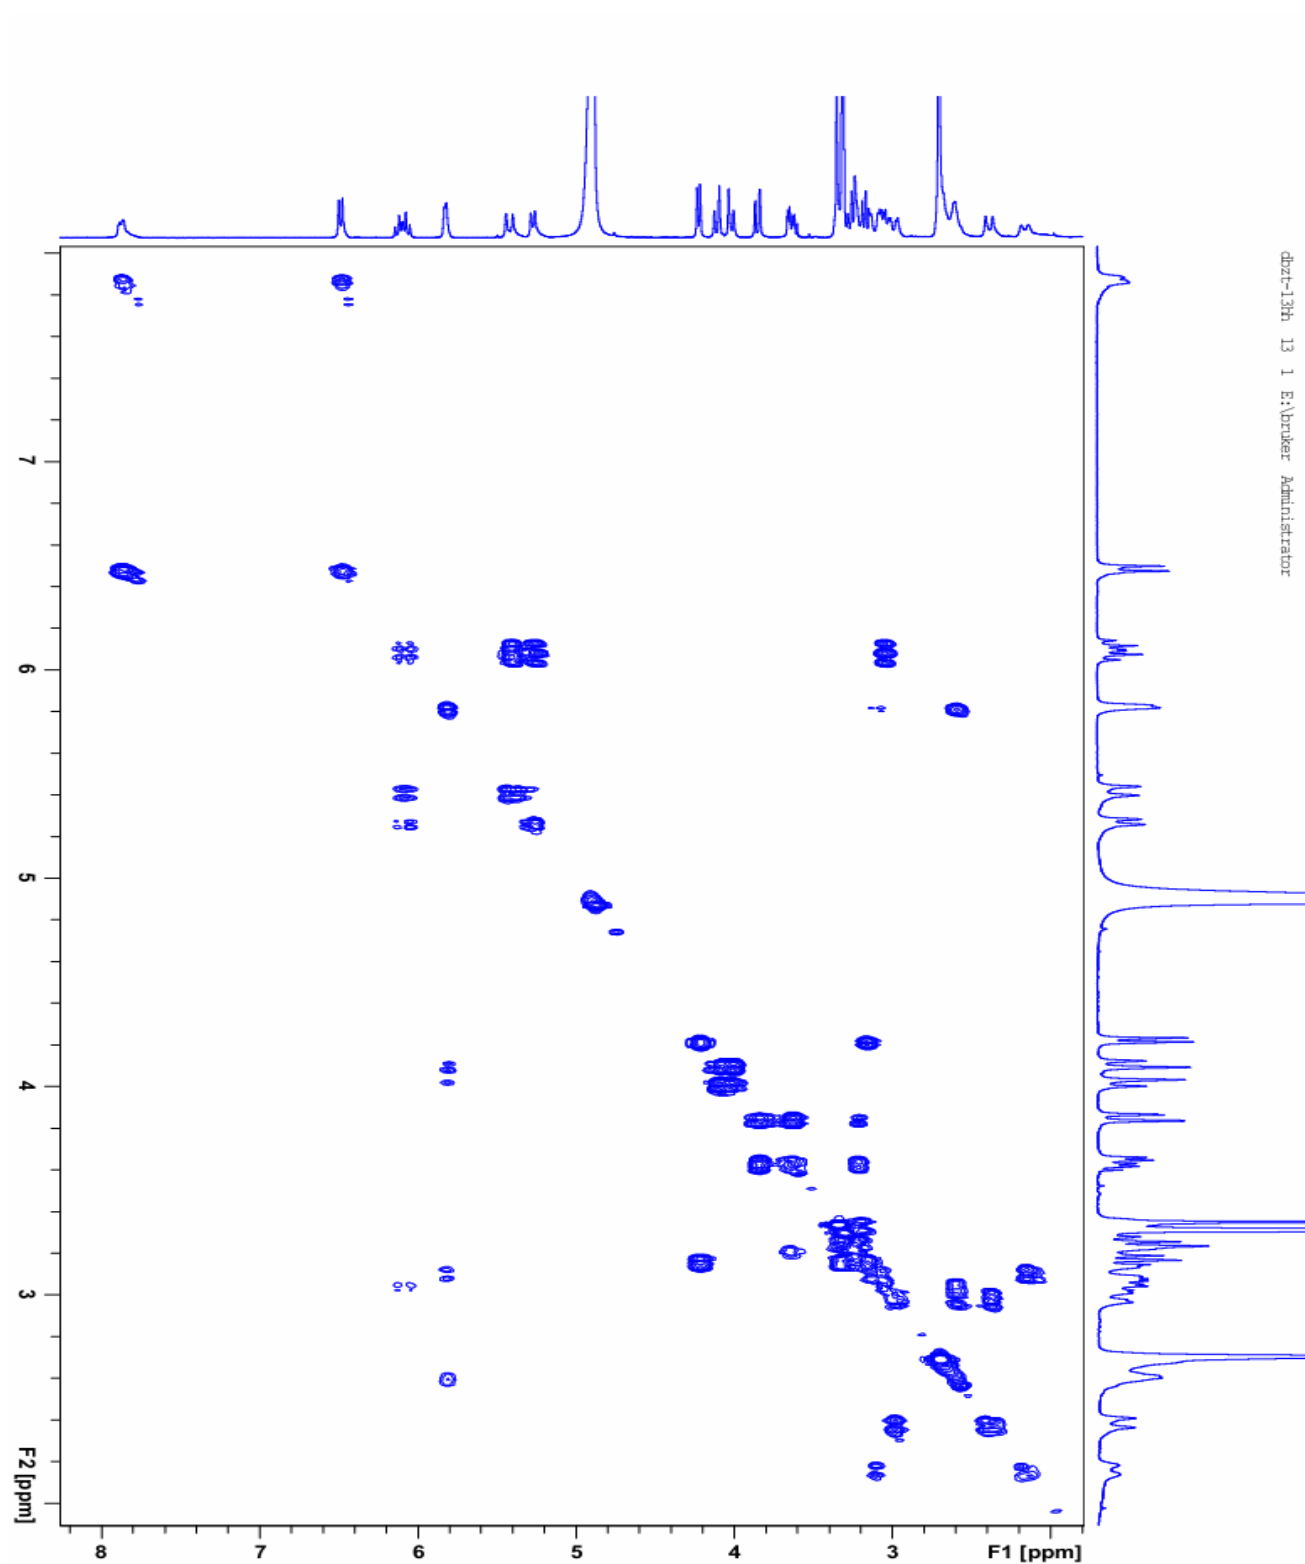

Figure S22. HSQC spectrum of compound 4.

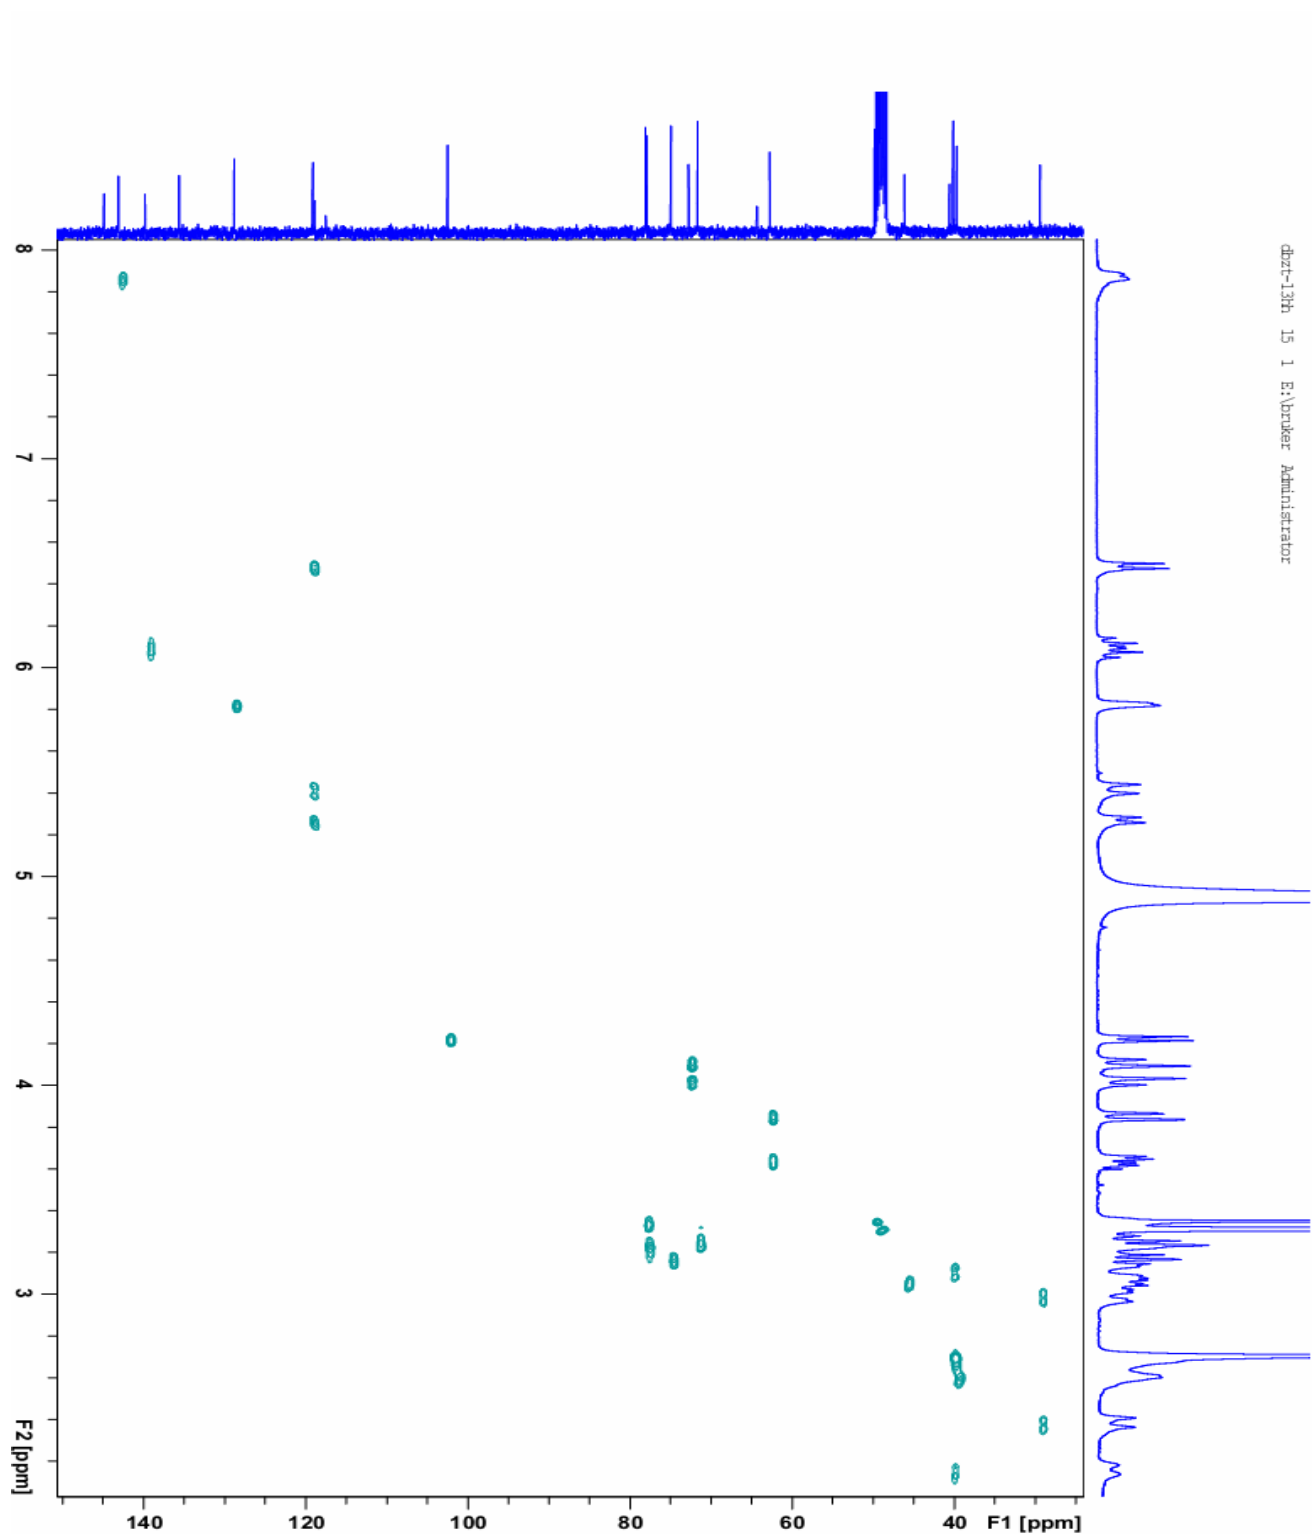

Figure S23. HMBC spectrum of compound 4.

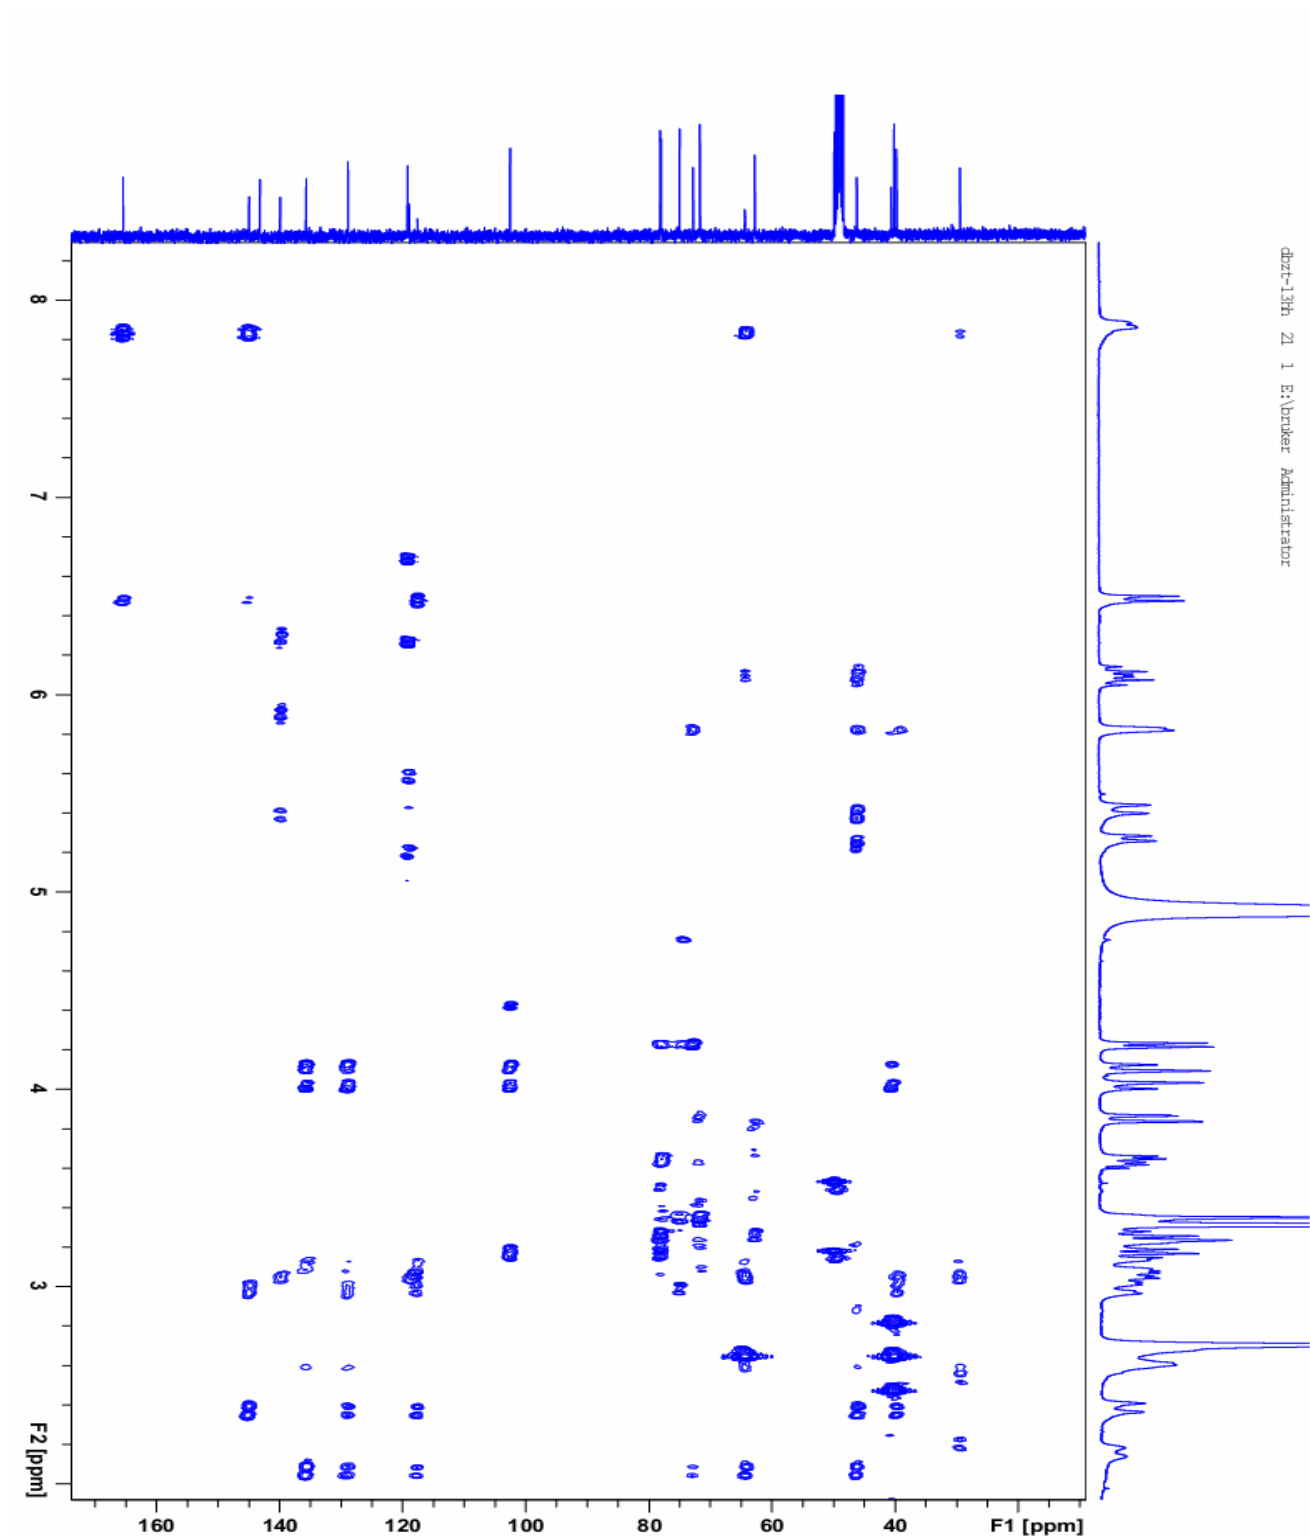

Figure S24. HRESIMS spectrum of compound 4.

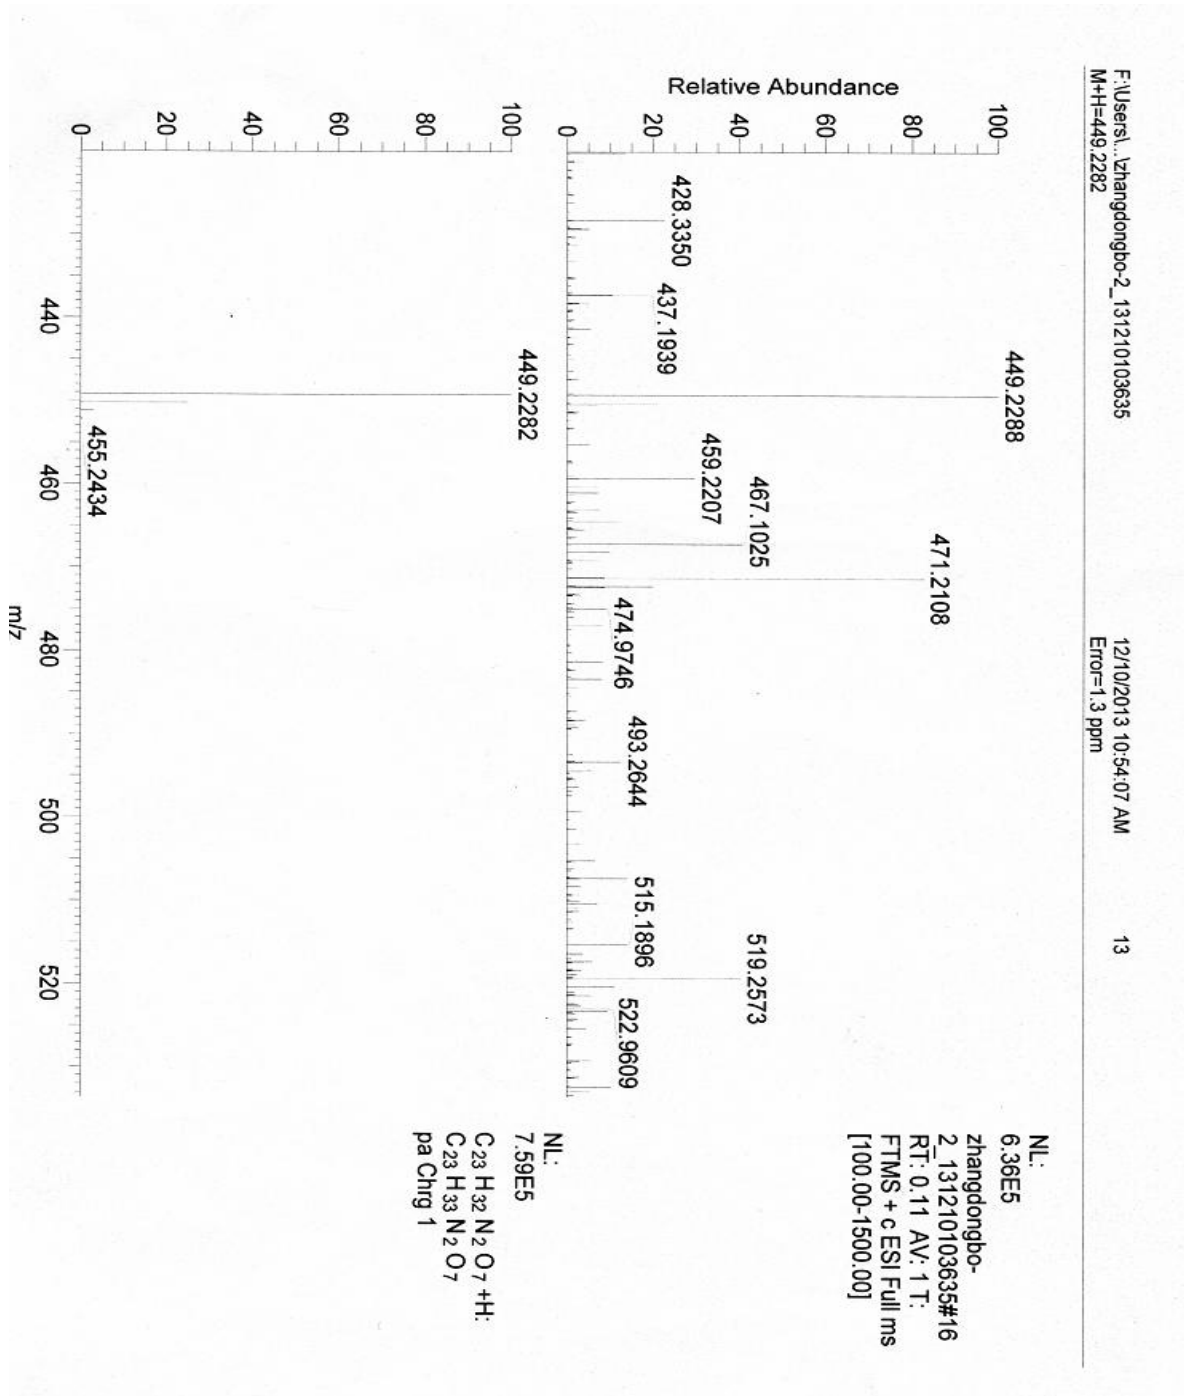

Supplement: s1 [file s1]
